# Supplementary material
Source: ML conference proceedings conference paper supplement (https://openreview.net/forum?id=S1OAqOtN5U)
Supplement: supplementary_material [file attachment]

# EfficientZero

## 1. 概述

样本效率（sample efficiency）是强化学习的一个关键挑战，一般来说需要高达数百万或者数十亿的环境步数（env steps）才能够取得相对来说理想的训练效果。尤其是在 Atari 等基准游戏测试中，如何在有限的交互中达到人类的表现水平依旧是一个困难的目标。在 MuZero 的基础上，作者们提出了一种高效的视觉 RL 算法 —— EfficientZero。这个方法在 Atari 100k 的 benchmark 上，只需要大约 2 个小时的训练数据就能达到超越人类的水平。具体来说，如图 1 所示，EfficientZero 在 Atari 游戏上能达到人类平均水平的 194.3% 和人类中位数水平的 109%。与此同时，在 DMControl 100k benchmark 上的效果也超过了将 state（非图像）作为 observation 的 SAC 算法（state SAC）。这也是第一次在训练数量样本有限的情况下，达到超越人类的水平。相比于 DQN 需要 200 million frames 的交互样本数量，EfficientZero 只需要它的五分之一。（code: <https://github.com/YeWR/EfficientZero>）

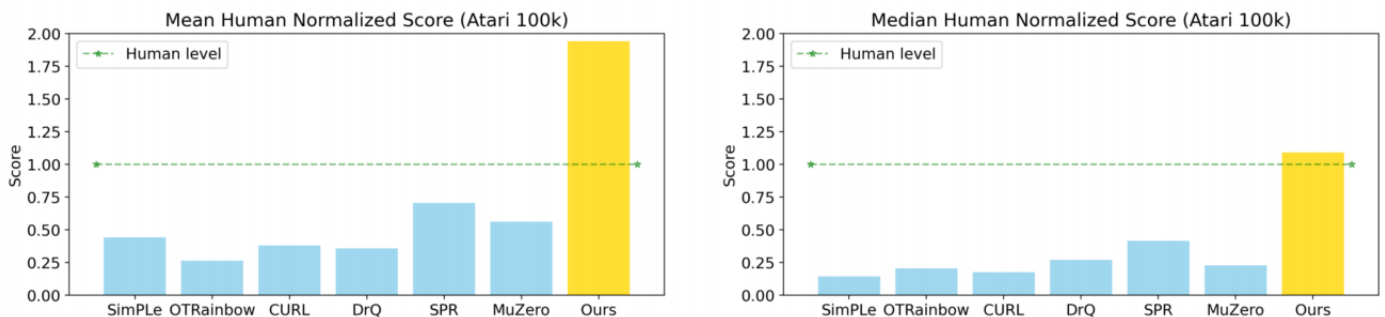

（图 1：EfficientZero 在 Atari 100k benchmark 上与其他方法和人类水平的比较。EfficientZero 在人类平均得分和中位数得分上达到了基线模型的 176% 和 163%，是第一个在该环境下能够超越平均人类水平的算法。EfficientZero 的高采样效率和性能让 RL 更贴近真实应用。）

## 2. 研究背景与相关工作

### 2.1 样本效率高的强化学习（Sample Efficient Reinforcement Learning）

样本效率（sample efficiency）这一话题在过去有很多相关工作。无模型 RL 在有限数据量场景中的性能远优于基于模型的 RL，例如，时序一致性损失与数据增强的结合能够达到较高性能 [1]。而基于模型的 RL 同时用确定性模型（如 RNN）和随机性模型（如 SSM）建模 dynamics model，在图像输入的模拟机器人控制中取得了很好效果 [2]，但其中基于模型的方法被证明是不必要的 [3]。EfficientZero 提出了一种基于模型的 RL 方法，在数据量有限的 Atari 上能够超越人类水平。

### 2.2 使用 MCTS 的强化学习（Reinforcement Learning with MCTS）

区别于 temporal difference learning 和 policy gradient based 等方法，MuZero 方法使用 MCTS 作为 policy improvement operator 并且在棋盘类游戏之中取得巨大的成功，例如在围棋 [4]，国际象棋和将棋之中 [5]。在此之后，它又被拓展到了连续动作空间 [6] 和离线数据 [7] 中。然而，这类基于 MCTS 的方法需要大量的数据，因此样本效率很低。

## 2.3 多步值估计方法（Multi-Step Value Estimation）

在 Q-learning 的时候，target Q value 往往通过 one step backup 来获得。在实践中，人们发现把多个 step 的奖励纳入 value 的估计之中，可以得到更快的收敛 [8] [9]。但是多步价值会有 off-policy 的常规问题，即自举（bootstrap）过程中的 value 并不是最新的 policy 得到的。为了解决这个问题，EfficientZero 提出了一个 model-based policy correction 方法，它根据当前策略，重新收集真实经验以获得最新奖励，并使用基于模型的估计方法来进行自举，在解决 off-policy 问题和模型的经验利用上达到了平衡。

# 3. EfficientZero 算法

## 3.1 概览图

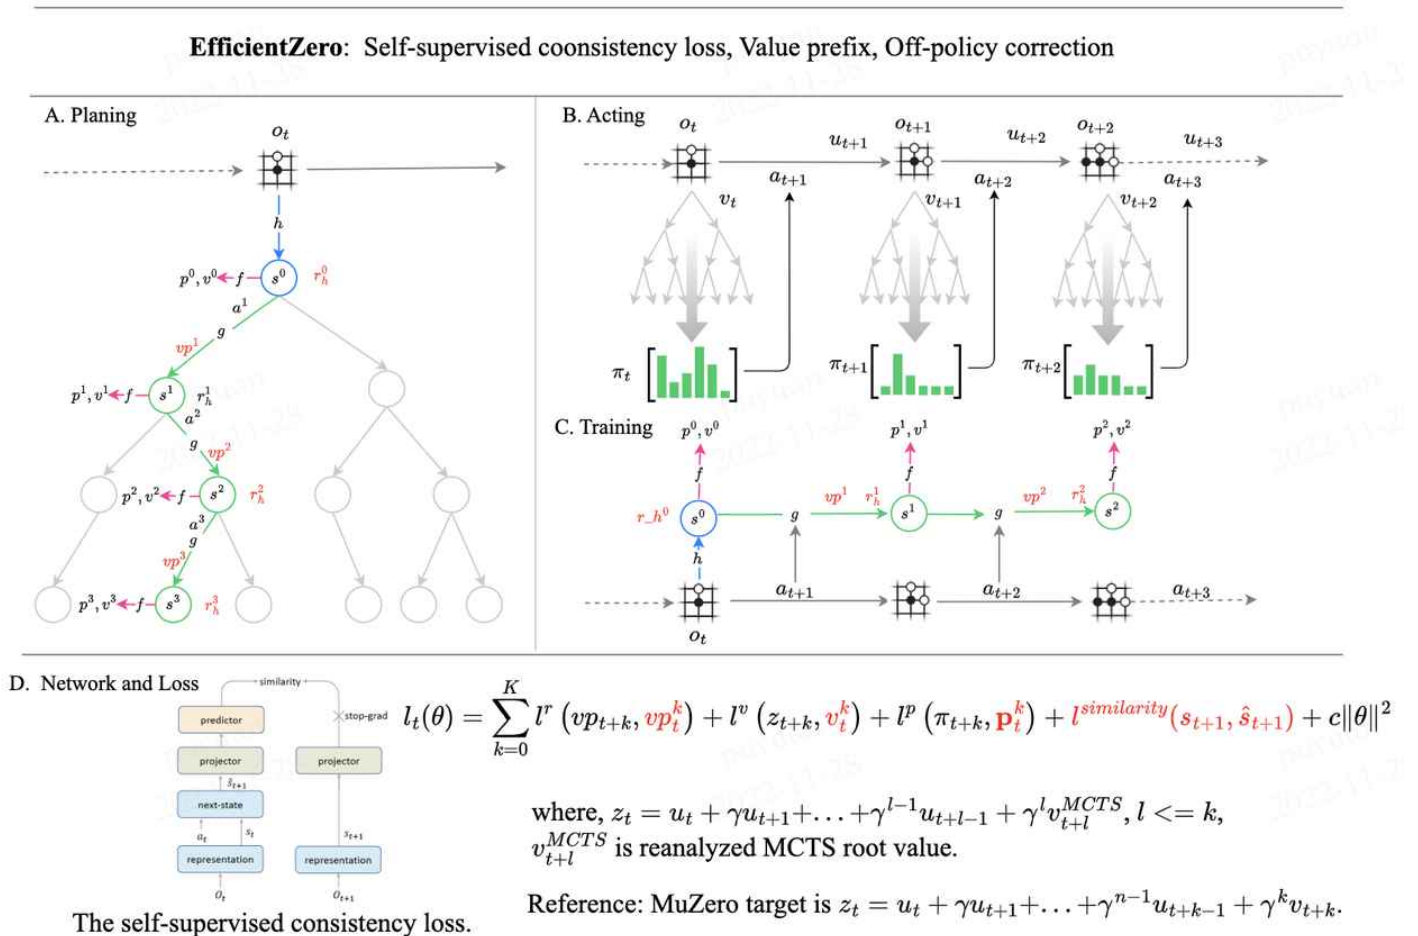

NOTE:  $g^{nn}$  (abbreviated as  $g$  in the figure) is the recurrent dynamics network,  $vp$  is value prefix,  $r_h$  is reward hidden state.

(图 2: EfficientZero 算法概览图。A: EfficientZero agent 利用 MCTS 进行规划, 其中 representation network  $h$  将连续  $t$  帧观测编码为 latent state  $s^0$ ; prediction network  $f$  在  $s^k$  下预测 policy  $p^k$  和 value prefix  $vp^k$ ; dynamics network  $g$  预测在  $s^{k-1}$  下执行动作会转移到的  $s^k$  和奖励  $r^k$ 。B: EfficientZero 和环境的交互过程中, 从某个观测  $o_t$  开始, 根据 MCTS 中根节点下各个动作的 visit count 的分布  $\pi_t$  选择动作  $a_{t+1}$  与环境交互得到新的观察  $o_{t+1}$  和回报  $u_{t+1}$ 。这样不断互动后得到整轨迹, 保存到 replay buffer 中。C: EfficientZero 在训练时根据 dynamics network  $g$  展开  $k$  步, 通过预测每一步的 reward, value prefix 和 policy 来学习模型。D: EfficientZero 的损失函数定义包含五个部分, 第一个部分为 dynamics network 预测的 value prefix 和真实 value prefix 之间的距离, 第二个部分和第三个部分为 prediction network 预测的 value 和 policy 与真实值之间的距离, 第四个部分是自监督一致性损失, 第五个部分为正则化项。符号的含义参考【算法概览图符号表.pdf】。)

当直接把 MuZero 直接应用到少样本的 benchmark 上面时, 它的表现并不好, 通过消融实验, 作者验证了它存在的三个问题:

- (1) 在学习环境模型时缺少监督信号。在 MuZero 里损失函数项分别优化的是 reward, value 和 policy。reward 只是标量信号, 且在很多环境中, reward 都是稀疏的。value 是通过自举训练得到的, 因此较为 noisy。策略是随着搜索过程训练得到的, 因此波动也很大。可以看到, reward, value 和 policy 三者都无法提供足够训练环境模型的监督信号。
- (2) 难以处理随机不确定性。由于环境的随机不确定性, 当环境较难建模时, 随着 MCTS 深度加大, 对奖励的预测误差也会随之变大。例如在卡牌游戏环境中, 对手卡牌的不可观测性导致环境本身具有随机不确定性, 因此对当前状态的奖励预测误差较大。
- (3) multi-step value 更新导致的 off-policy 问题。虽然 multi-step value 让奖励能够更快传播到 value function。但在数据有限的情况下, 使用 off-policy 的旧策略收集的数据中, 奖励是由旧策略得到的, 这导致对 target-value 的更新不准确, 导致 value function 不容易收敛。

针对以上问题, EfficientZero 做了如下的三点改进, 即:

- (1) 设计自监督 (时序) 一致性损失。
- (2) 使用端到端的学习 value prefix, 预测时间段内奖励值之和, 降低预测 reward 不准导致的误差。
- (3) 改变 Multi-step reward 的算法, 使用一个自适应的展开长度来纠正 off-policy target。

下面将依次详细介绍以上三点改进:

### 3.2 自监督 (时序) 一致性损失

在以前 MCTS 工作中, 环境模型有些是直接已知的, 有些则通过训练 rewards, values 和 policies 来得到。然而, 这些变量往往只是标量, 无法提供足够的训练信息。当环境的奖励是稀疏的, 或者自举更新的 value 不准确时, 这一问题尤为严重。为了得到足够的模型训练信号, 作者提出了**自监督一致性损失**, 即 **dynamic model 预测得到的  $\hat{s}_{t+1}$  应该和实际的  $s_{t+1}$  一致**。这一方法可以让实际的  $s_{t+1}$  作为监督信号, 对 dynamic model 的预测与训练进行监督, 而  $s_{t+1}$  往往是几百维的张量, 相对于标

量有更多的训练信号。值得注意的是，隐藏状态  $s_{t+1}$  和预测状态  $\hat{s}_{t+1}$  的一致性可以直接通过 dynamics function 来构造，而不需要提供额外的模型。

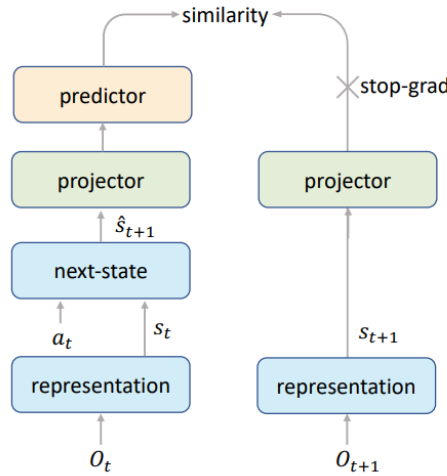

(图 3：自监督一致性损失（self-supervised consistency loss）。)

具体的说，是使用 Sim-Siam 自监督框架，它可以获取同一张图片的两个增强视图，并将第二个增强视图分支的输出向第一个视图的输出拉近。其中第一个分支是不反传梯度的编码器网络，第二个分支由相同但反传梯度编码器网络和 prediction head 组成，其中 prediction head 可以是简单的 MLP 网络。

原始的 Sim-Siam 自监督模型 [10] 仅能学习到单个图像的特征，但无法得知不同图像之间的关联，因此 Sim-Siam 对 transition 前后两帧的特征可能完全不同，不适用于学习 transition function。为了解决这一问题，作者改进了这个自监督模型，实现了端到端的训练，具体的逻辑可以参考图 3。由于训练的目标是找到相邻帧的转移关系，因此要将  $\hat{s}_{t+1}$  拉近  $s_{t+1}$ 。该模型首先从  $o_t$  中得到  $s_t$  的特征，再经过 transition function 转变为  $\hat{s}_{t+1}$ 。而另一个分支从  $o_{t+1}$  中得到  $s_{t+1}$  的特征，此时两个分支预测的为同一个实体。另外，两个分支预测的  $s_{t+1}$  都要经过一个共同的 projector 网络。由于  $s_{t+1}$  是从  $o_{t+1}$  中表示得到的，相对于 transition function 预测的  $\hat{s}_{t+1}$  更为准确，因此以  $o_{t+1}$  的分支作为目标分支，该分支不回传梯度。

此外，作者也发现在 observation 上添加数据增强有助于提高学习到的特征的质量。除了让  $\hat{s}_{t+1}$  和  $s_{t+1}$  靠近，作者也将 dynamic function 展开 5 步，让  $\hat{s}_{t+k}$  和  $s_{t+k}$  接近 ( $k = 1, \dots, 5$ )。

在实际实现中， $\hat{s}_{t+1}$  和  $s_{t+1}$  之间的一致性损失定义为：左边分支 predictor 预测得到的  $\hat{z}_{t+1}$  和右侧分支 stop-grad 的 projector 输出的  $z_{t+1}$  之间余弦相似度的负数。此时最小化一致性损失，即最大化两者的余弦相似度，其范围为  $[-1, 1]$ ：

$$\cos\_similarity(z_{t+1}, \hat{z}_{t+1}) = \frac{z_{t+1} \cdot \hat{z}_{t+1}}{\|z_{t+1}\| \|\hat{z}_{t+1}\|}$$

### 3.3 端到端的 Value Prefix 预测

在基于模型的学习中，agent 只需要根据当前的状态，和想象执行的动作序列，就可以预测未来的状态。这期间会遇到 state aliasing problem，即由于循环预测导致的累计误差，预测的时间越长，预测

的准确性就越低。这个问题可能导致次优的探索和次优动作选择（sub-optimal exploration as well as sub-optimal action search）。

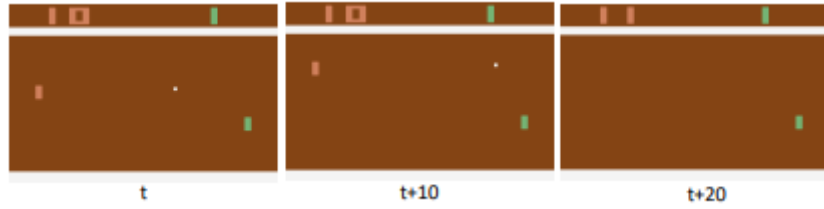

(图 4：Pong 中的轨迹样例。)

作者给出了一个例子：如图 4 所示，右侧玩家未能接到这个球。但如果只看到  $t$  时刻的状态和未来的动作序列，我们很难预测出，是中间具体哪个时刻决策失误而导致了丢球这个结果。但是我们很容易发现，如果  $t$  时刻之后一段时间右边玩家都不动的话，就一定会丢球。因此，预测单一状态下的奖励是很困难的，但预测长期的奖励往往比较容易。根据这一发现，作者提出了一种端到端的方式来预测 **value prefix**，即用 **unrolled states** 预测 **value prefix**。

计算 UCT 中的  $Q$  值的时候，预测的 reward 总是通过如下方式被用到：

$$Q(s_t, a) = \sum_{i=0}^{k-1} \gamma^i r_{t+i} + \gamma^k v_{t+k}$$

因此我们可以把前面的  $\sum_{i=0}^{k-1} \gamma^i r_{t+i}$  命名为 value prefix，由于它是在计算  $Q$  函数时候的前缀 (prefix)。

例如，value prefix =  $f(s_t, \hat{s}_{t+1}, \dots, \hat{s}_{t+k-1})$ ，其中  $f$  为神经网络，输入是当前状态和未来各个时刻的预测状态。在实验中，使用 LSTM 网络来预测时序信息。在实际训练时，因为每个新的状态输入时都需要重新计算 value prefix，因此 LSTM 网络在每个时间步都进行有监督训练。相比于简单的预测单步分数，这种 per-step rich supervision 预测 value prefix 的方法可以更好的避免 state aliasing problem，让 MCTS 能够更好地探索，最终提高效果。

### 3.4 基于模型的 Off-Policy 修正

在传统的 MCTS 算法中，值函数估计是当前神经网络对应的 value 值。而在 MuZero Reanalyze 实际实现中，value target 是通过采样 replay buffer 中的轨迹得到的： $z_t = \sum_{i=0}^{k-1} \gamma^i u_{t+i} + \gamma^k v_{t+k}$ 。由于这一轨迹中 rollout 的 reward 是用旧的策略得到的，因此计算出的 value target 并不准确。当数据量有限时，计算 value target 还需要复用更久以前的 policy 采样得到的数据，这更加剧了 value target 不准确的问题。

因此作者提出了基于模型的 Off-Policy 修正，基于已经学到的环境模型，进行“在线体验”（online experience），即从历史轨迹中使用奖励的视野是动态的（dynamic horizon）。具体来说，当采用  $k$ -step 的 value target 估计时，历史轨迹中 reward 的时间窗口  $l < k$ ，且采样的轨迹越古老，则  $l$  的长度越短。这通过减少 rollout 的步数减少 off-policy 带来的策略发散问题。



同时，作者还在最后一个状态  $s_{t+l}$  上用当前的策略重新进行一次 MCTS 搜索，并计算根节点的真实平均 value。这有效地修正了 off-policy 问题，也减少了设置  $l < k$  带来的偏差。

value target 由历史轨迹的真实奖励和在状态上  $s_{t+l}$  的 MCTS 估计值组成。其中历史轨迹是根据过去的策略得到的，导致了 off-policy 问题；而 MCTS 估计值和真实的奖励期望之间存在偏差过大的问题。因此用最新策略重新进行 MCTS 搜索能够减小偏差，而设置  $l < k$  能够减少历史轨迹的影响，从而修正 off-policy 的问题。

最终，目标的 value 可以表征为：

$$z_t = \sum_{i=0}^{l-1} \gamma^i u_{t+i} + \gamma^l v_{t+l}^{MCTS}$$

其中  $v_{t+l}^{MCTS}$  是用当前策略在  $s_{t+l}$  上扩展的 MCTS 树的 root value。事实上，这一修正的计算成本是 reanalyze 计算侧的两倍，但由于训练是并行的，因此并不会受到影响。

## 4. 实验

### 4.1 网络结构及具体实现

- representation network 使用和 MuZero 相同的架构。
- dynamics network 相对于 MuZero，其输出 reward 的 head 变为输出 value prefix。且网络中加入了 LSTM，其隐藏状态作为 hidden state 输出。
- prediction network 使用和 MuZero 相同的架构。

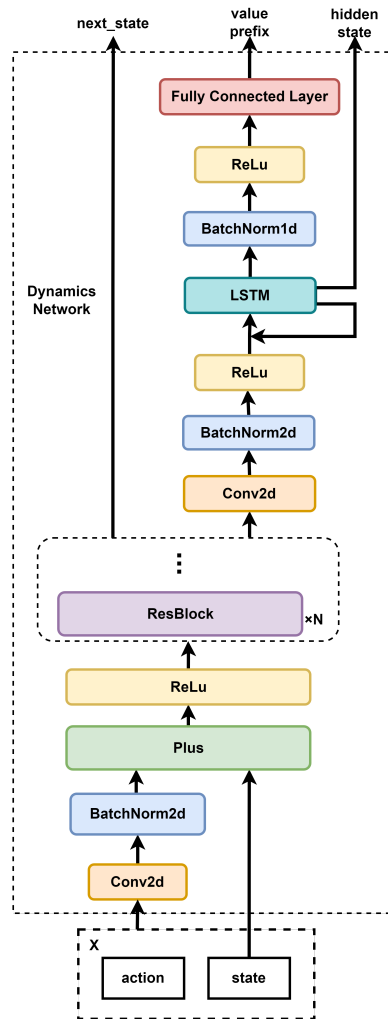

(图 5: EfficientZero 的动力学网络结构图。)

EfficientZero 的具体实现采用了并行的方式，其具体 pipeline 如图 6 和图 7 所示。首先，最左侧的 worker 会通过 600 步的 self-play 收集数据，并放到 replay buffer 中。中间的 rollout worker 从 replay buffer 中采集轨迹并拆分为 batch transition，将其中的 context 交给最右侧的 batch worker，这一步只需要 CPU 参与。而 batch worker 用 GPU 对 batch transition 进行 reanalyze 后，将数据交由 learner 学习。由于这三个工作流程分别使用到 self-play，CPU 和 GPU，因此完全可以并行进行。

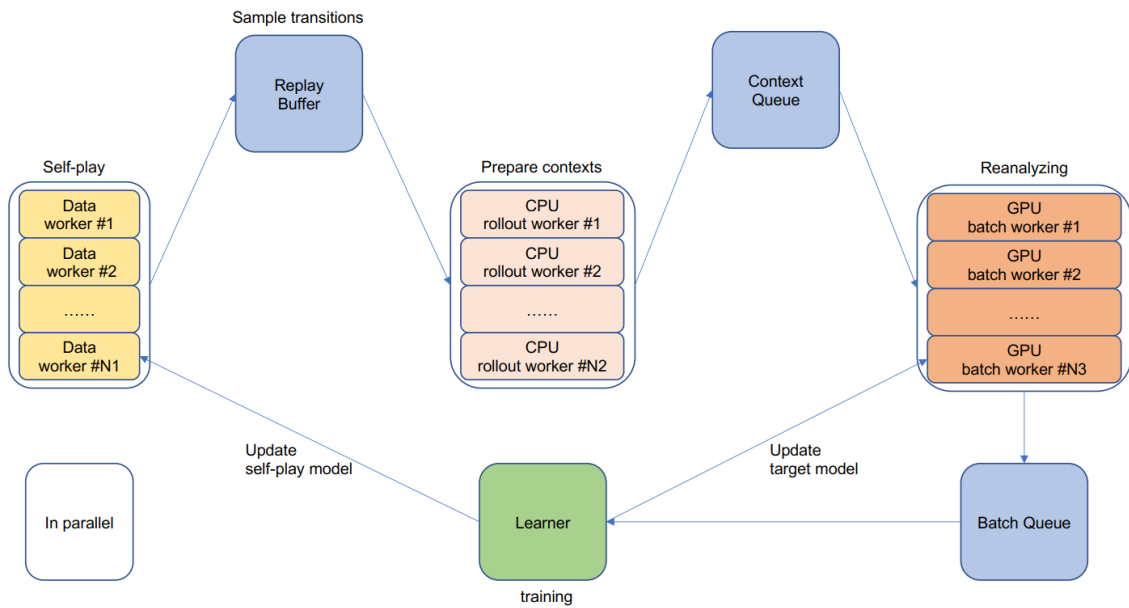

(图 6: EfficientZero 具体实现的 pipeline。)

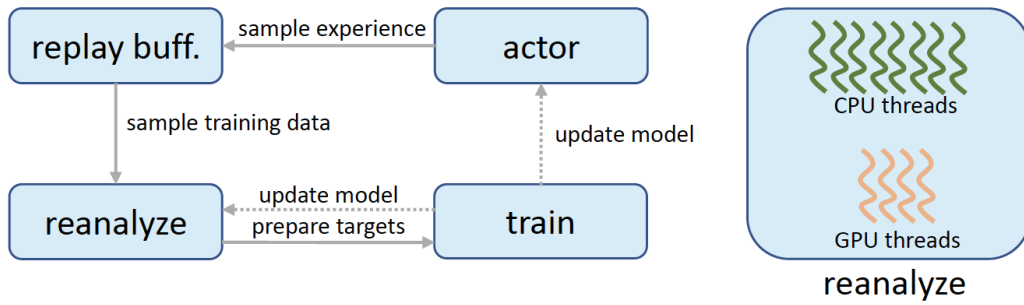

(图 7: EfficientZero 具体实现的概览图。)

## 4.2 Atari 100k Benchmark 上的基线比较结果

此处 human normalized score 定义为:

$$\frac{score_{agent} - score_{random}}{score_{human} - score_{random}}$$

EfficientZero 与 基线算法比较结果如下:



| Game           | Random  | Human   | SimPLe        | OTRainbow    | CURL         | DrQ     | SPR            | MuZero        | Ours           |
|----------------|---------|---------|---------------|--------------|--------------|---------|----------------|---------------|----------------|
| Alien          | 227.8   | 7127.7  | 616.9         | <b>824.7</b> | 558.2        | 771.2   | 801.5          | 530.0         | 808.5          |
| Amidar         | 5.8     | 1719.5  | 88.0          | 82.8         | 142.1        | 102.8   | <b>176.3</b>   | 38.8          | 148.6          |
| Assault        | 222.4   | 742.0   | 527.2         | 351.9        | 600.6        | 452.4   | 571.0          | 500.1         | <b>1263.1</b>  |
| Asterix        | 210.0   | 8503.3  | 1128.3        | 628.5        | 734.5        | 603.5   | 977.8          | 1734.0        | <b>25557.8</b> |
| Bank Heist     | 14.2    | 753.1   | 34.2          | 182.1        | 131.6        | 168.9   | <b>380.9</b>   | 192.5         | 351.0          |
| BattleZone     | 2360.0  | 37187.5 | 5184.4        | 4060.6       | 14870.0      | 12954.0 | <b>16651.0</b> | 7687.5        | 13871.2        |
| Boxing         | 0.1     | 12.1    | 9.1           | 2.5          | 1.2          | 6.0     | 35.8           | 15.1          | <b>52.7</b>    |
| Breakout       | 1.7     | 30.5    | 16.4          | 9.8          | 4.9          | 16.1    | 17.1           | 48.0          | <b>414.1</b>   |
| ChopperCmd     | 811.0   | 7387.8  | 1246.9        | 1033.3       | 1058.5       | 780.3   | 974.8          | <b>1350.0</b> | 1117.3         |
| Crazy Climber  | 10780.5 | 35829.4 | 62583.6       | 21327.8      | 12146.5      | 20516.5 | 42923.6        | 56937.0       | <b>83940.2</b> |
| Demon Attack   | 152.1   | 1971.0  | 208.1         | 711.8        | 817.6        | 1113.4  | 545.2          | 3527.0        | <b>13003.9</b> |
| Freeway        | 0.0     | 29.6    | 20.3          | 25.0         | <b>26.7</b>  | 9.8     | 24.4           | 21.8          | 21.8           |
| Frostbite      | 65.2    | 4334.7  | 254.7         | 231.6        | 1181.3       | 331.1   | <b>1821.5</b>  | 255.0         | 296.3          |
| Gopher         | 257.6   | 2412.5  | 771.0         | 778.0        | 669.3        | 636.3   | 715.2          | 1256.0        | <b>3260.3</b>  |
| Hero           | 1027.0  | 30826.4 | 2656.6        | 6458.8       | 6279.3       | 3736.3  | 7019.2         | 3095.0        | <b>9315.9</b>  |
| Jamesbond      | 29.0    | 302.8   | 125.3         | 112.3        | 471.0        | 236.0   | 365.4          | 87.5          | <b>517.0</b>   |
| Kangaroo       | 52.0    | 3035.0  | 323.1         | 605.4        | 872.5        | 940.6   | <b>3276.4</b>  | 62.5          | 724.1          |
| Krull          | 1598.0  | 2665.5  | 4539.9        | 3277.9       | 4229.6       | 4018.1  | 3688.9         | 4890.8        | <b>5663.3</b>  |
| Kung Fu Master | 258.5   | 22736.3 | 17257.2       | 5722.2       | 14307.8      | 9111.0  | 13192.7        | 18813.0       | <b>30944.8</b> |
| Ms Pacman      | 307.3   | 6951.6  | <b>1480.0</b> | 941.9        | 1465.5       | 960.5   | 1313.2         | 1265.6        | 1281.2         |
| Pong           | -20.7   | 14.6    | 12.8          | 1.3          | -16.5        | -8.5    | -5.9           | -6.7          | <b>20.1</b>    |
| Private Eye    | 24.9    | 69571.3 | 58.3          | 100.0        | <b>218.4</b> | -13.6   | 124.0          | 56.3          | 96.7           |
| Qbert          | 163.9   | 13455.0 | 1288.8        | 509.3        | 1042.4       | 854.4   | 669.1          | 3952.0        | <b>13781.9</b> |
| Road Runner    | 11.5    | 7845.0  | 5640.6        | 2696.7       | 5661.0       | 8895.1  | 14220.5        | 2500.0        | <b>17751.3</b> |
| Seaquest       | 68.4    | 42054.7 | 683.3         | 286.9        | 384.5        | 301.2   | 583.1          | 208.0         | <b>1100.2</b>  |
| Up N Down      | 533.4   | 11693.2 | 3350.3        | 2847.6       | 2955.2       | 3180.8  | <b>28138.5</b> | 2896.9        | 17264.2        |
| Normed Mean    | 0.000   | 1.000   | 0.443         | 0.264        | 0.381        | 0.357   | 0.704          | 0.562         | <b>1.943</b>   |
| Normed Median  | 0.000   | 1.000   | 0.144         | 0.204        | 0.175        | 0.268   | 0.415          | 0.227         | <b>1.090</b>   |

(表 1: EfficientZero 在 Atari 100k benchmark 上与基线算法的比较。)

在根据人类水平分数进行标准化后，EfficientZero 的平均得分达到了 1.943，中位数得分达到了 1.090。作为比较，DQN 达到了 2.20 的平均得分和 0.959 的中位数得分，然而需要 500 倍于 EfficientZero 的数据量（2 亿帧）。这是第一个只需要 2 小时游戏数据就能超过人类水平的模型，在 26 个游戏上有 14 个游戏优于人类。先对于当前最优算法 SPR，EfficientZero 的平均得分和中位数得分分别提高了 170%和 180%。

### 4.3 DMControl 100k Benchmark 上的基线比较结果

EfficientZero 在模拟任务中也取得了显著的效果。如表 2 所示，EfficientZero 相对于当前最优算法 CURL 有明显的性能提升。此外，EfficientZero 也达到了和 state SAC 相当的水平，而 state SAC 由于使用的是真实 state，因此被视作 oracles。

| Task               | CURL     | Dreamer   | MuZero      | SAC-AE  | Pixel SAC | State SAC | EfficientZero |
|--------------------|----------|-----------|-------------|---------|-----------|-----------|---------------|
| Cartpole, Swingup  | 582± 146 | 326±27    | 218.5 ± 122 | 311±11  | 419±40    | 835±22    | <b>813±19</b> |
| Reacher, Easy      | 538± 233 | 314±155   | 493 ± 145   | 274±14  | 145±30    | 746±25    | <b>952±34</b> |
| Ball in cup, Catch | 769± 43  | 246 ± 174 | 542 ± 270   | 391± 82 | 312± 63   | 746±91    | <b>942±17</b> |

(表 2: EfficientZero 在 DMControl 100k benchmark 上和基线模型的比较结果。)

### 4.4 三个改进的 Ablation Study

首先，作者从模型中分别去掉这三种改进，并在 Atari 上实验效果如下：

| Game          | Full         | w.o. consistency | w.o. value prefix | w.o. off-policy correction |
|---------------|--------------|------------------|-------------------|----------------------------|
| Normed Mean   | <b>1.943</b> | 0.881            | 1.482             | 1.475                      |
| Normed Median | <b>1.090</b> | 0.340            | 0.552             | 0.836                      |

(表 3: EfficientZero 中去除三种模块后在 Atari 上的性能效果。)

## 自监督一致性损失对图像重建的影响

为了探究自监督一致性损失这一模块带来的影响，作者设计了解码器，从 latent state 中重建 observation。从结果中观察到，当没有一致性损失时，representation network 分支的 latent states 和 dynamics function 分支的 state 中存在一些分布的偏移，而一致性损失的加入可以减少偏移，提供更多监督信号。

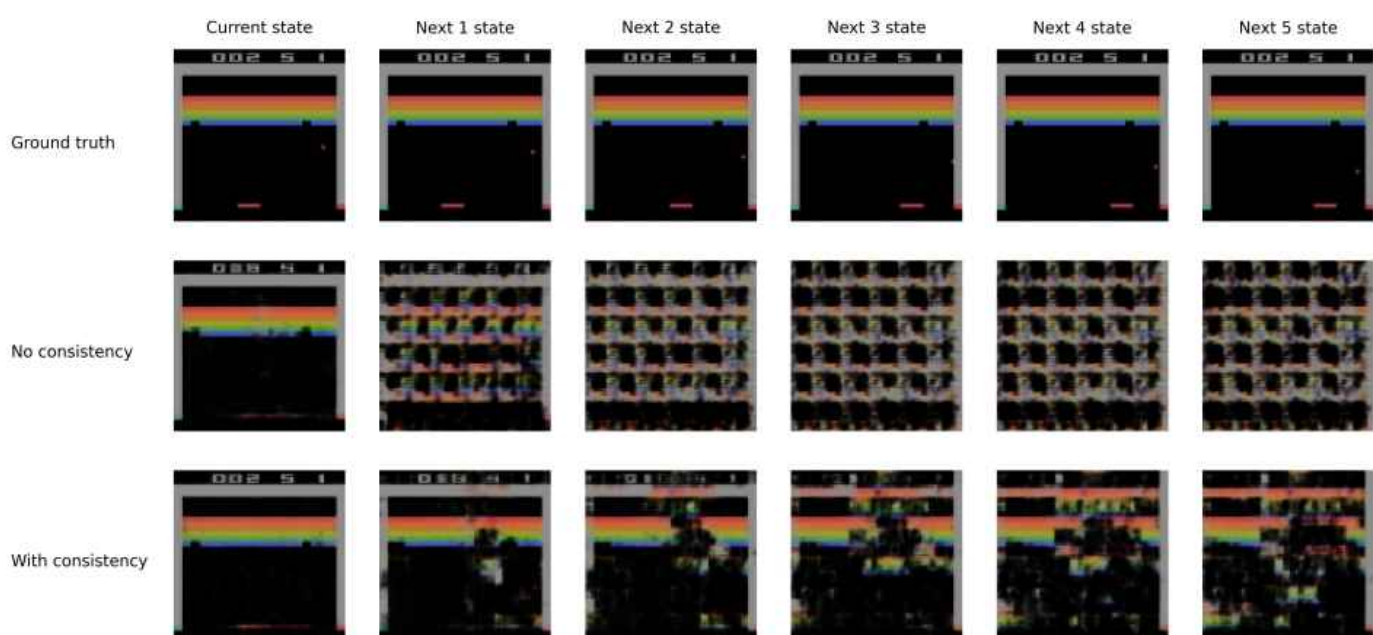

(图 8: 自监督一致性损失对图像重建的影响。)

## Value Prefix 在 Training 和 Validation 过程中对 Loss 的影响

作者在同一个训练集和验证集上进行实验，发现不使用 value prefix 在 training 时能达到更低的 loss，但在 validation 时，使用 value prefix 的 loss 明显更低。这说明 value prefix 可以避免奖励预测的过拟合，从而避免 state aliasing problem。

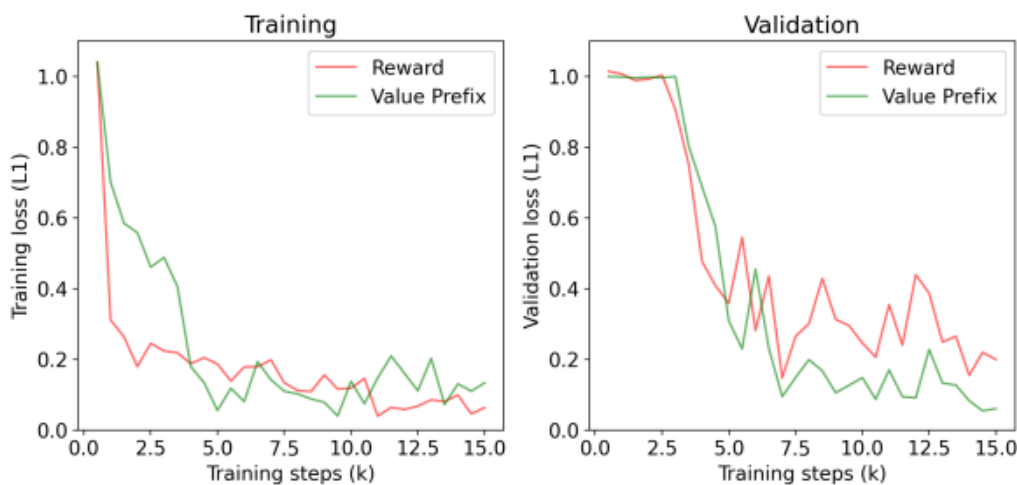

(图 9：使用 value prefix 和不使用 value prefix 在训练和验证时的损失变化趋势。)

## Off-Policy 修正对未来状态预测 L1 Error 的影响

为了验证 off-policy 修正的效果，作者比较了 target value 和 ground truth value 之间的误差。以游戏 UpNDown 为例，玩家需要操控一辆车在两条交错的车道上行驶和跳跃，当跳跃到其他车上或吃到旗帜时可以得分，当被其他车撞到时失去一条生命。在该环境中，无论是在当前状态还是 unrolled 状态下，有 off-policy 修正都会降低 error。

| States                         | Current state | Unrolled next 5 states (Avg.) | All states (Avg.) |
|--------------------------------|---------------|-------------------------------|-------------------|
| Value error without correction | 0.765         | 0.636                         | 0.657             |
| Value error with correction    | <b>0.533</b>  | <b>0.576</b>                  | <b>0.569</b>      |

(表 4：UpNDown 上 target value 和 ground truth value 之间的 L1 误差。)

作者还比较了在不同的游戏阶段上 (20k, ..., 100k) 的 value error。发现当轨迹越新时，value error 也越小，这说明 off-policy 问题是因为数据的滞后性导致的。

| Stages of trajectories         | 20k          | 40k          | 60k          | 80k          | 100k         |
|--------------------------------|--------------|--------------|--------------|--------------|--------------|
| Value error without correction | 0.657        | 0.697        | 0.628        | 0.574        | 0.441        |
| Value error with correction    | <b>0.569</b> | <b>0.552</b> | <b>0.537</b> | <b>0.488</b> | <b>0.397</b> |

(表 5：UpNDown 上不同阶段的平均 L1 误差。)

## 4.5 EfficientZero 在 Atari 上的超参数与性能

在 Atari 的 26 个游戏上，EfficientZero 以如下超参数进行训练：

| Parameter                                                    | Setting                |
|--------------------------------------------------------------|------------------------|
| Observation down-sampling                                    | $96 \times 96$         |
| Frames stacked                                               | 4                      |
| Frames skip                                                  | 4                      |
| Reward clipping                                              | True                   |
| Terminal on loss of life                                     | True                   |
| Max frames per episode                                       | 108K                   |
| Discount factor                                              | $0.997^4$              |
| Minibatch size                                               | 256                    |
| Optimizer                                                    | SGD                    |
| Optimizer: learning rate                                     | 0.2                    |
| Optimizer: momentum                                          | 0.9                    |
| Optimizer: weight decay ( $c$ )                              | 0.0001                 |
| Learning rate schedule                                       | $0.2 \rightarrow 0.02$ |
| Max gradient norm                                            | 5                      |
| Priority exponent ( $\alpha$ )                               | 0.6                    |
| Priority correction ( $\beta$ )                              | $0.4 \rightarrow 1$    |
| Training steps                                               | 120K                   |
| Evaluation episodes                                          | 32                     |
| Min replay size for sampling                                 | 2000                   |
| Self-play network updating interval                          | 100                    |
| Target network updating interval                             | 200                    |
| Unroll steps ( $l_{\text{unroll}}$ )                         | 5                      |
| TD steps ( $k$ )                                             | 5                      |
| Policy loss coefficient ( $\lambda_1$ )                      | 1                      |
| Value loss coefficient ( $\lambda_2$ )                       | 0.25                   |
| Self-supervised consistency loss coefficient ( $\lambda_3$ ) | 2                      |
| LSTM horizontal length ( $\zeta$ )                           | 5                      |
| Dirichlet noise ratio ( $\xi$ )                              | 0.3                    |
| Number of simulations in MCTS ( $N_{\text{sim}}$ )           | 50                     |
| Reanalyzed policy ratio                                      | 0.99                   |

(表 6: EfficientZero 在 Atari 游戏上训练的参数设定。)

得到的验证曲线如下:

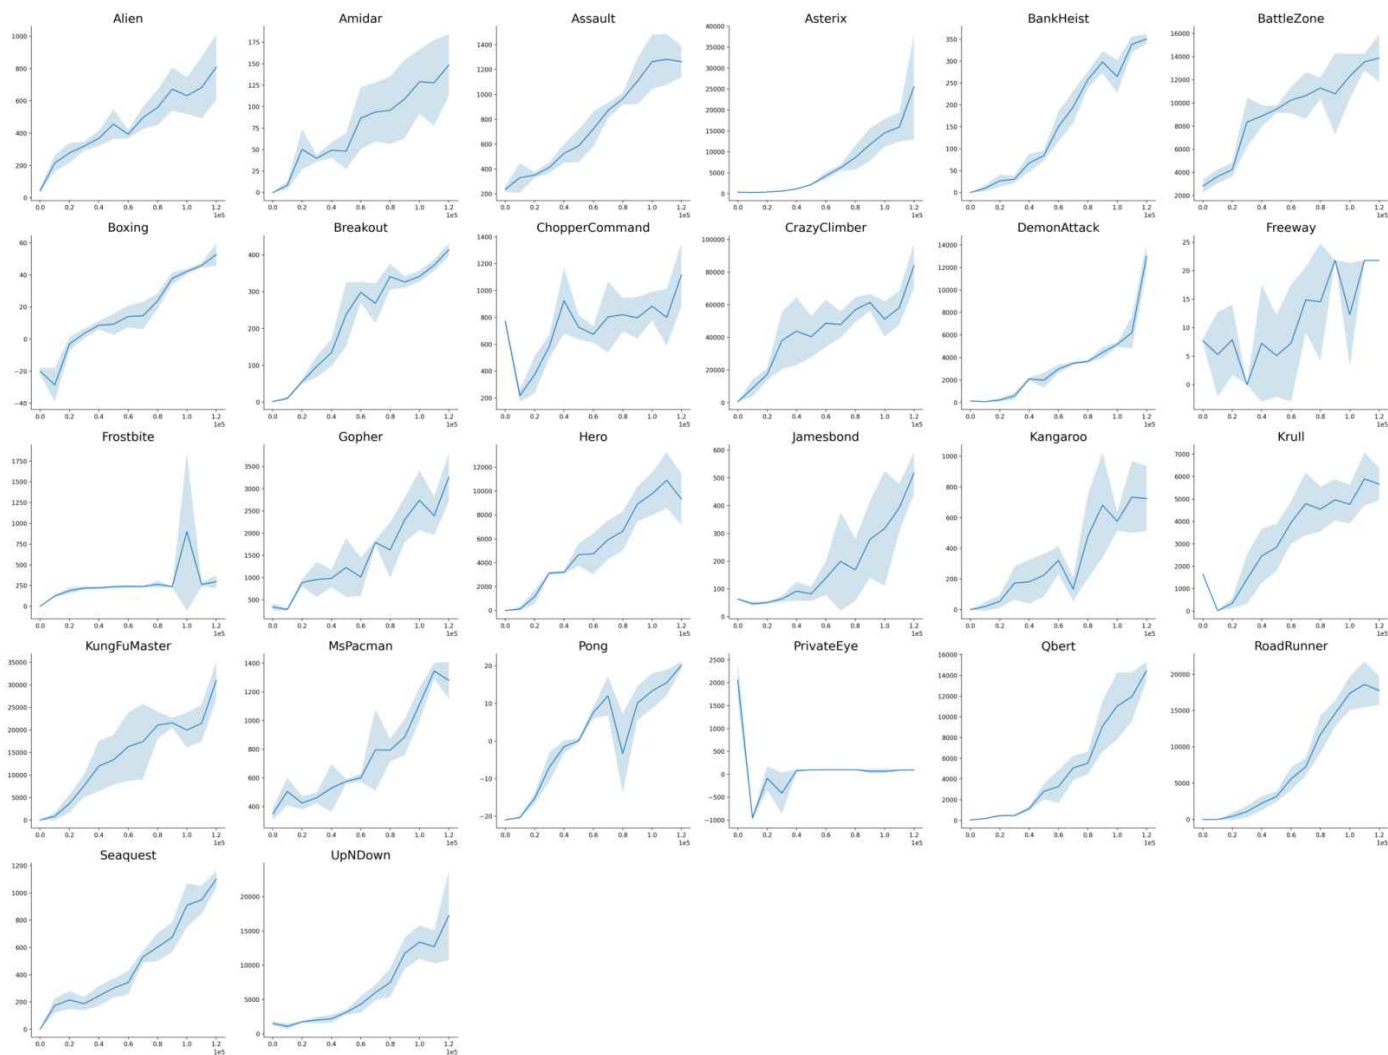

(图 10: EfficientZero 在 Atari 上验证时的奖励曲线。)

此外，由于使用统计工具能够得到更鲁棒和有效的指标，作者在图 11 中展示了基于 Agarwal 的开源代码得到的置信区间结果。可以看到，无论用哪种指标进行比较，EfficientZero 都明显优于其他方法。

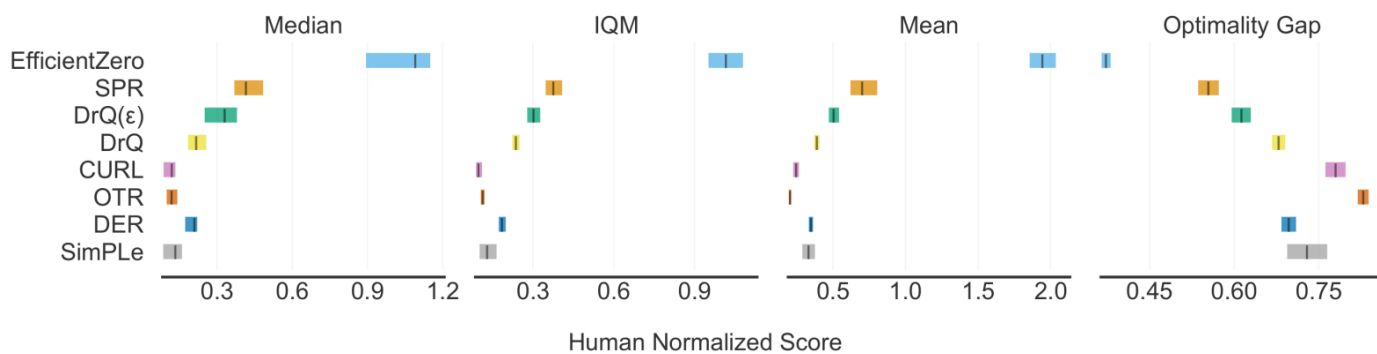

(图 11: EfficientZero 及基线模型在 Atari 上的 95%置信区间。)

## 5. 总结与展望

总的来说，EfficientZero 是将 MuZero 扩展到了复杂感知输入领域，在 MuZero 的基础上提出了三种改进：自监督一致性损失、端到端的 value prefix 和 off-policy 修正，并分别设计 ablation 实验说明了这三种改进的有效性：



- 样本利用效率较高，在少量样本下就能达到与先前算法相当甚至更好的效果。
- 用 value prefix 代替 reward，从预测单个时间点的奖励变为预测长期奖励，在数据集规模较小时，减少对奖励预测的过拟合。
- 通过在历史轨迹中使用动态长度的经验，并用当前策略获得最新经验，修正了 off-policy 问题和 MCTS 的估计偏差。

未来的研究方向包括：

- 如何将 EfficientZero 延伸到其他类型场景上，例如连续动作空间。
- 如何进行 MCTS 的加速。
- 如何将这一框架和 life-long study 进行结合。

## 6. 参考文献

- [1] Schwarzer M, Anand A, Goel R, et al. Data-efficient reinforcement learning with self-predictive representations[J]. arXiv preprint arXiv:2007.05929, 2020.
- [2] Hafner D, Lillicrap T, Fischer I, et al. Learning latent dynamics for planning from pixels[C]//International conference on machine learning. PMLR, 2019: 2555-2565.
- [3] Kielak K P. Do recent advancements in model-based deep reinforcement learning really improve data efficiency?[J]. 2020.
- [4] Silver D, Huang A, Maddison C J, et al. Mastering the game of Go with deep neural networks and tree search[J]. nature, 2016, 529(7587): 484-489.
- [5] Silver D, Schrittwieser J, Simonyan K, et al. Mastering the game of go without human knowledge[J]. nature, 2017, 550(7676): 354-359.
- [6] Hubert T, Schrittwieser J, Antonoglou I, et al. Learning and planning in complex action spaces[C]//International Conference on Machine Learning. PMLR, 2021: 4476-4486.
- [7] Schrittwieser J, Antonoglou I, Hubert T, et al. Mastering atari, go, chess and shogi by planning with a learned model[J]. Nature, 2020, 588(7839): 604-609.
- [8] Mnih V, Kavukcuoglu K, Silver D, et al. Human-level control through deep reinforcement learning[J]. nature, 2015, 518(7540): 529-533.
- [9] Hessel M, Modayil J, Van Hasselt H, et al. Rainbow: Combining improvements in deep reinforcement learning[C]//Proceedings of the AAAI conference on artificial intelligence. 2018, 32(1).
- [10] Chen X, He K. Exploring simple siamese representation learning[C]//Proceedings of the IEEE/CVF conference on computer vision and pattern recognition. 2021: 15750-15758.
