# Supplementary material
Source: ML conference proceedings conference paper supplement (https://openreview.net/forum?id=S1OAqOtN5U)
Supplement: supplementary_material [file attachment]

**AlphaGo**  
Nature 2016  
with Expert Data, Domain  
Knowledge and Known Rules;  
Value NN, Policy NN;  
Env: Go

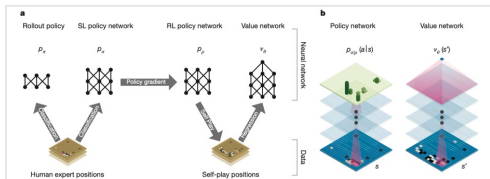

**AlphaZero**  
Science 2018  
with Known Rules;  
Restructure Self-Play;  
Env: Go, Chess, Shogi

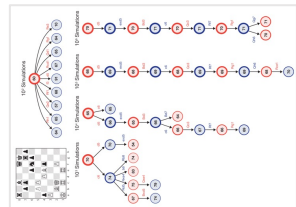

**EfficientZero**  
NeurIPS 2021  
Self-Supervised Consistency Loss;  
Value Prefix Prediction;  
Model-Based Off-Policy Correction;  
Env: Atari, DMC

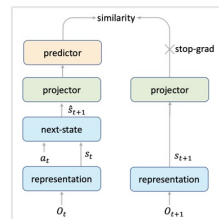

**MuZero Unplugged**  
NeurIPS 2021  
Reanalyse;  
Offline RL;  
Env: Atari and DMC Dataset

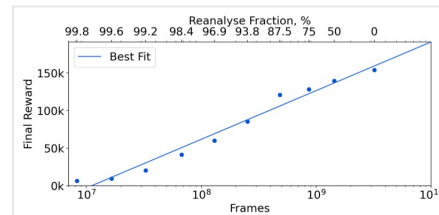

**Gumbel MuZero**  
ICLR 2022  
Planning with Gumbel;  
Planning at Non-Root Nodes;  
Env: Go, Chess, Atari

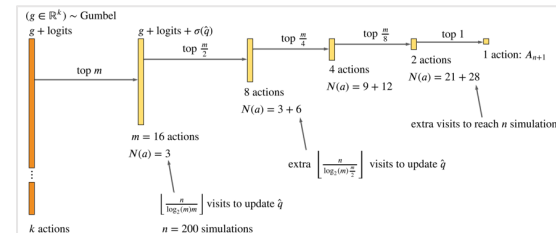

2016

2017

2018

2020

2021

2022

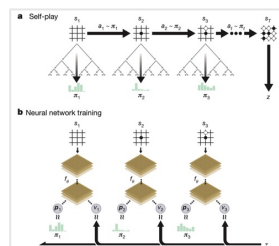

**AlphaGo Zero**  
Nature 2017  
with Known Rules;  
A single Residual NN  
for Value and Policy;  
Self-Play;  
Env: Go

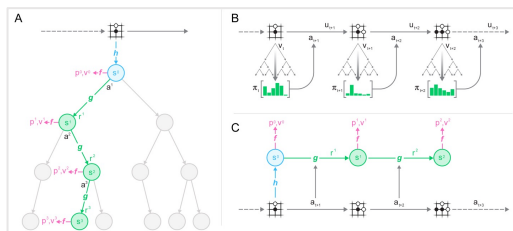

**MuZero**  
Nature 2020  
without Any Knowledge;  
Representation State;  
Model-Based;  
Env: Go, Chess, Shogi, Atari

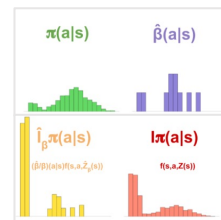

**Sampled MuZero**  
ICML 2021  
Sample-Based Policy Iteration;  
Extend to Complex Action Space;  
Env: Go, DMC, RWRL

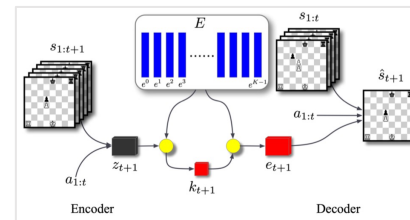

**VQVAE MuZero**  
ICML 2021  
VQ Model;  
Stochastic MCTS;  
Env: Chess Dataset, DM Lab

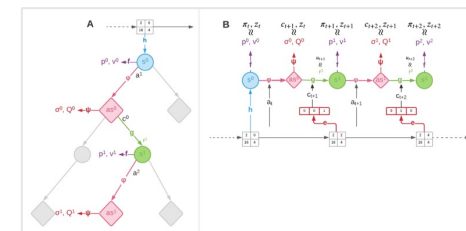

**Stochastic MuZero**  
ICLR 2022  
Stochastic Model;  
Stochastic Tree Search;  
Env: 2048, Backgammon, Go
