# Supplementary material
Source: ML conference proceedings conference paper supplement (https://openreview.net/forum?id=S1OAqOtN5U)
Supplement: supplementary_material [file attachment]

## A. Planing

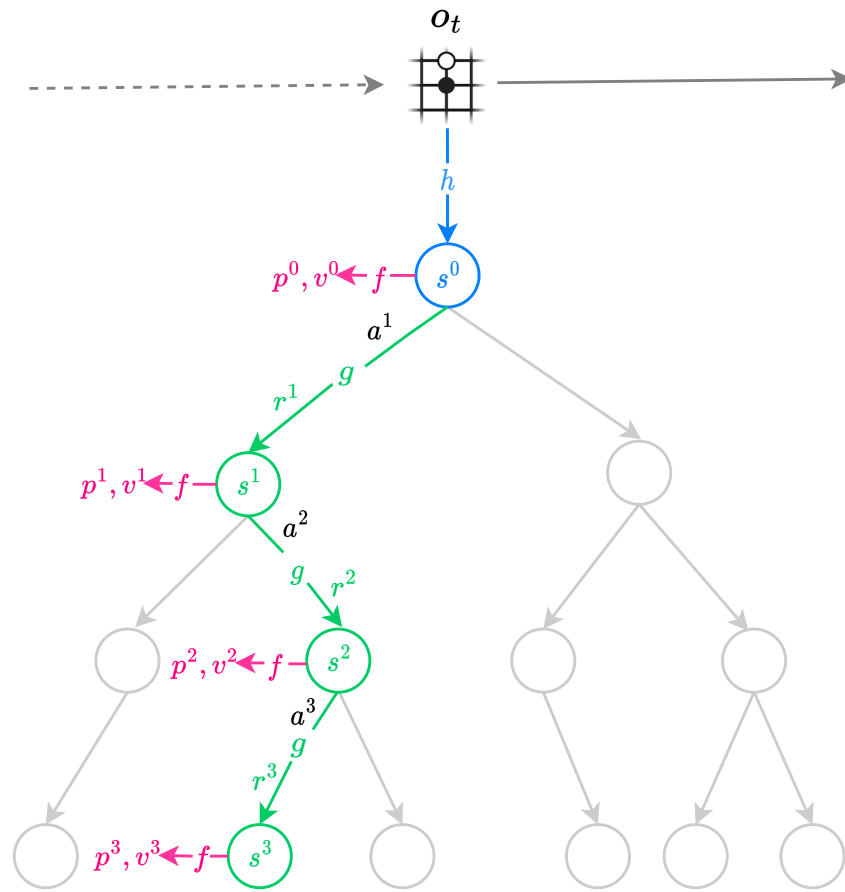

### Selection:

In each node, agent select action  $a^k$  according to the UCB score:

$$a^k = \arg \max_a \left[ Q(s, a) + P(s, a) \cdot \frac{\sqrt{\sum_b N(s, b)}}{1 + N(s, a)} \left( c_1 + \log \left( \frac{\sum_b N(s, b) + c_2 + 1}{c_2} \right) \right) \right]$$

### Expansion:

At the leaf node (i.e. final timestep  $l$ ), the reward and hidden state are computed by the dynamics  $r^l, s^l = g^{(l-1)}(a^l)$  and stored in the corresponding tables. The policy and value are computed by the prediction function,  $p^l, v^l = f(s^l)$ .

A new node, corresponding to state  $s^l$  is added to the search tree. Each edge  $(s^l, a)$  from the newly expanded node is initialized to  $\{N(s^l, a) = 0, Q(s^l, a) = 0, P(s^l, a) = \mathbf{p}^l\}$

### Backup:

For  $k = l \dots 1$ , we update the statistics for each edge  $(s^{k-1}, a^k)$  in the simulation path as follows,  $Q(s^{k-1}, a^k) := \frac{N(s^{k-1}, a^k) \cdot Q(s^{k-1}, a^k) + G^k}{N(s^{k-1}, a^k) + 1}$ ,

$$N(s^{k-1}, a^k) := N(s^{k-1}, a^k) + 1,$$

where, in hypothetical step  $k$ , we utilize the  $l - k$  bootstrapped estimate  $Q$  value:

$$G^k = \sum_{\tau=0}^{l-1-k} \gamma^\tau r_{k+1+\tau} + \gamma^{l-k} v^l$$

## B. Acting

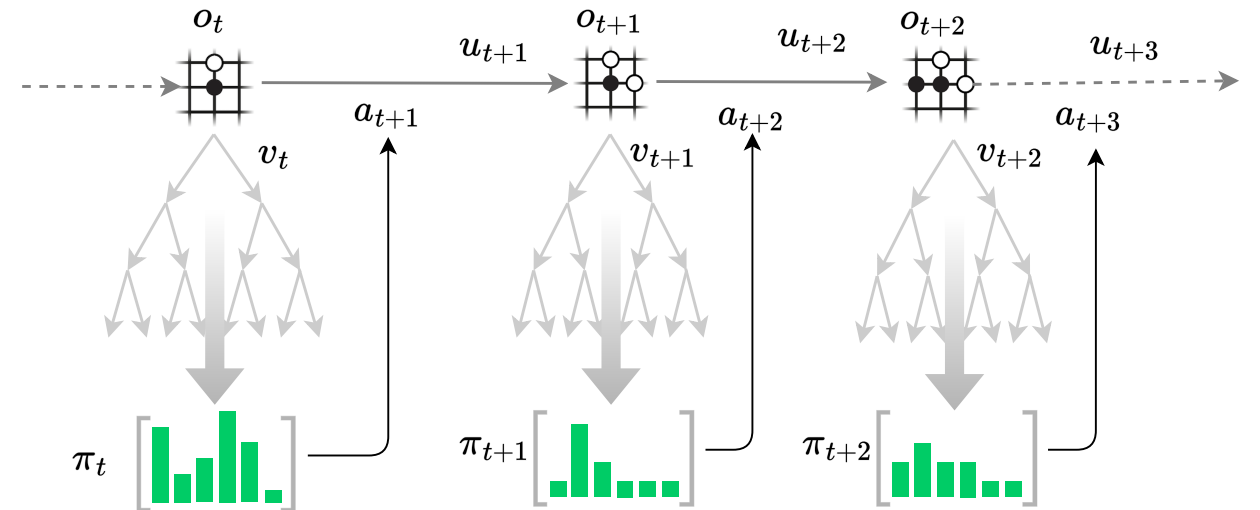

## C. Training

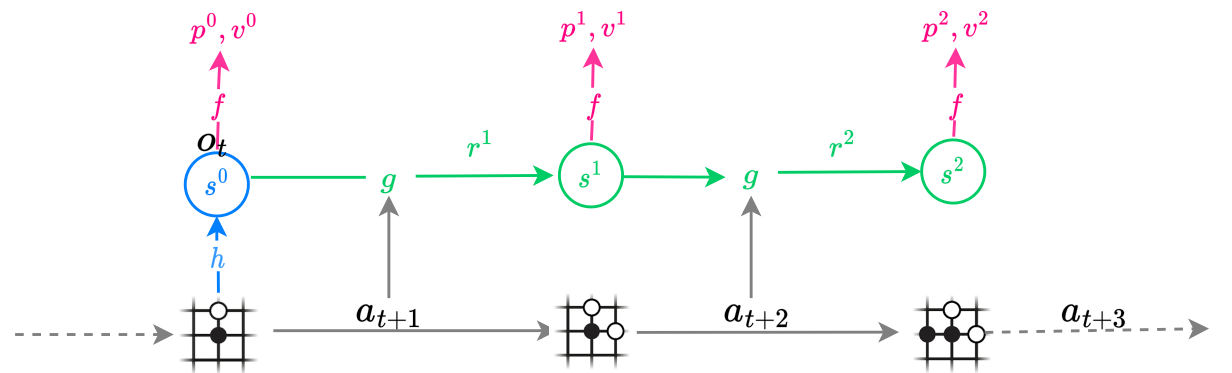

## D. Loss

$$l_t(\theta) = \sum_{k=0}^K l^r(u_{t+k}, \mathbf{r}_t^k) + l^v(z_{t+k}, \mathbf{v}_t^k) + l^p(\pi_{t+k}, \mathbf{p}_t^k) + c \|\theta\|^2$$

where,  $u_{t+k}$  is the observed reward,  $\pi_{t+k}$  is the MCTS searched policy,  $z_{t+k}$  is the bootstrapped n-step target:

$$z_{t+k} = u_{t+k+1} + \gamma u_{t+k+2} + \dots + \gamma^{n-1} u_{t+k+n} + \gamma^n \mathbf{v}_{t+k+n},$$

$\mathbf{v}_{t+k+n}$  is the MCTS searched value.

In Atari,  $l^r$  and  $l^v$  is cross-entropy loss, while in board games,  $l^v$  is MSE loss and there is no  $l^r$  due to no intermediate reward.  $l^p$  is cross-entropy loss for both.

NOTE:  $g$  is the dynamic network (MLP, without RNN), value rescale, categorical distribution for reward and value in Atari, Reanalyze
