# Supplementary material
Source: ML conference proceedings conference paper supplement (https://openreview.net/forum?id=S1OAqOtN5U)
Supplement: supplementary_material [file attachment]

# Gumbel MuZero: Planning with few simulations in high dimensional discrete action space

## A. Planing

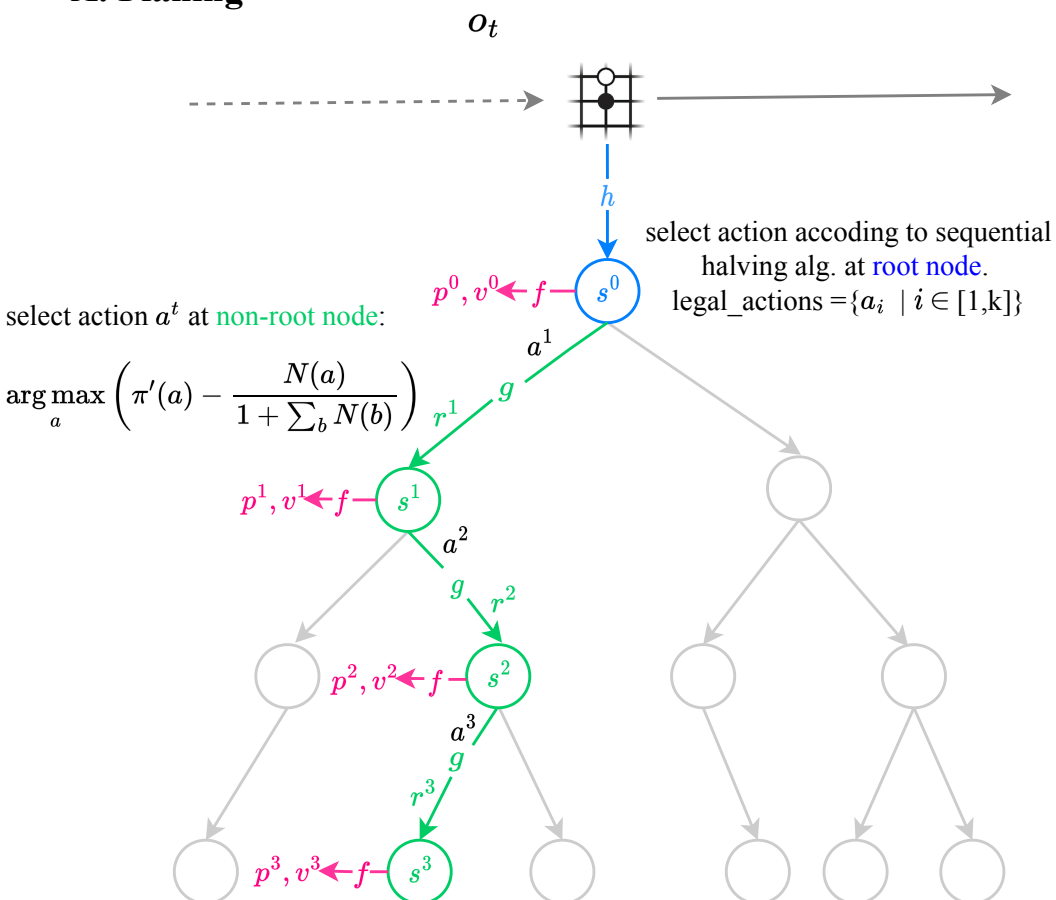

The key issue when the num of simulations  $n <$  num of total actions  $k$  in MCTS search is **how to choose which actions to visit and how many times**.

1. we can control the number of actions sampled without replacement.
2. we can use a bandit algorithm to efficiently explore the set of sampled actions.

**Sequential Halving** is used to identify the action with the highest  $g(a) + \text{logits}(a) + \sigma(\hat{q}(a))$ .

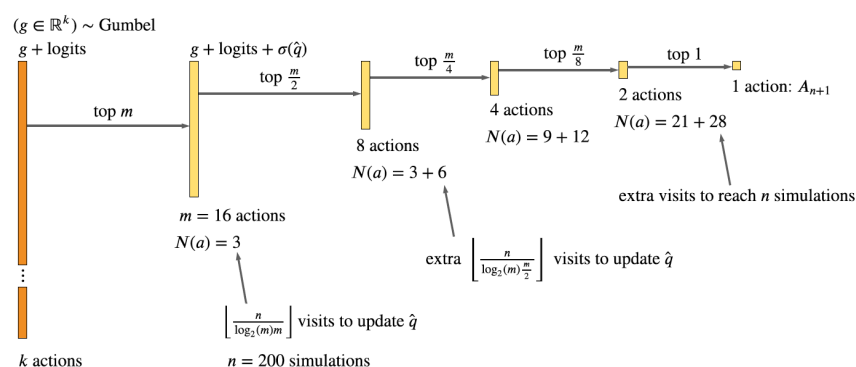

## B. Acting

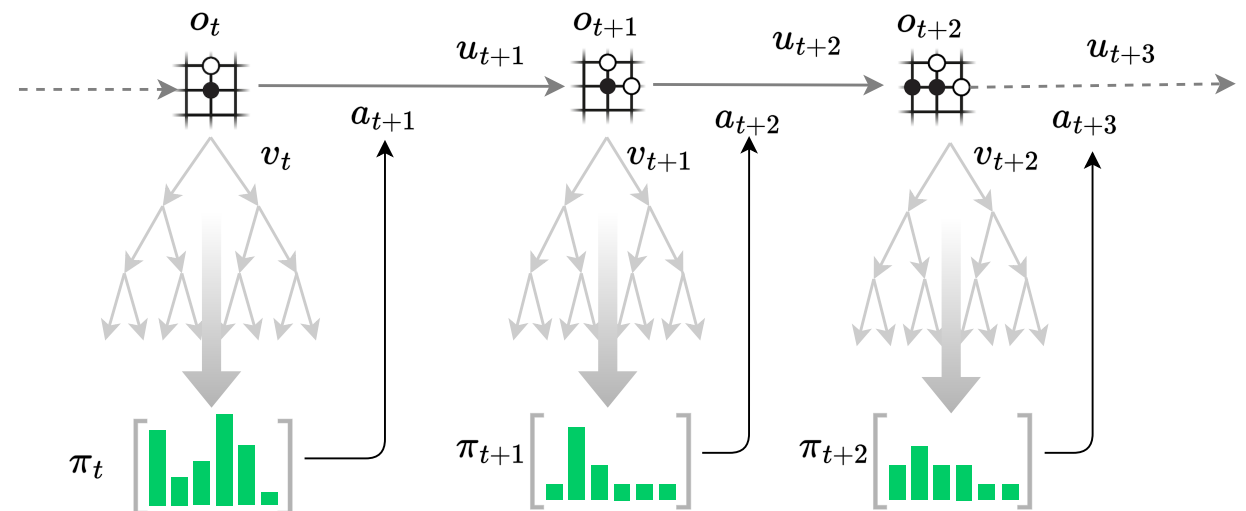

## C. Training

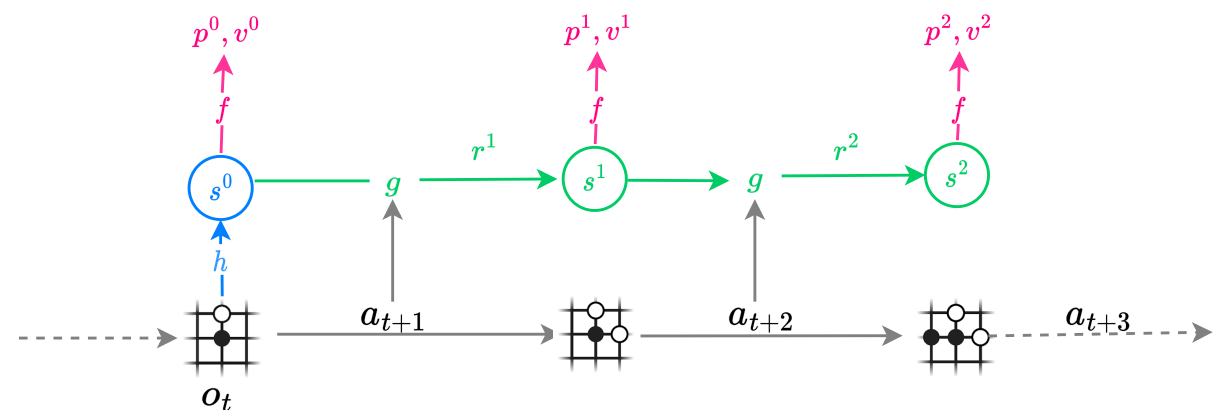

## D. Loss

$$l_t(\theta) = \sum_{k=0}^K l^r(u_{t+k}, r_t^k) + l^v(z_{t+k}, v_{t, \text{mix}}^k) + KL(\pi'_{t+k}, \pi_t^k) + c \|\theta\|^2$$

**mixed value approximate:**

$$v_{\text{mix}} = \frac{1}{1 + \sum_b N(b)} \left( \hat{v}_\pi + \frac{\sum_b N(b)}{\sum_{b \in \{b: N(b) > 0\}} \pi(b)} \sum_{a \in \{a: N(a) > 0\}} \pi(a) q(a) \right)$$

**improved policy distribution:**  $\pi' = \text{softmax}(\text{logits} + \sigma(\text{completedQ}))$

$$\text{completedQ}(a) = \begin{cases} q(a) & \text{if } N(a) > 0 \\ v_\pi, & \text{otherwise} \end{cases}$$

NOTE:  $p$  is policy distribution,  $\pi'$  is the **improved** policy distribution, **completedQ**( $a$ ) is the **completed** Q values,  $q(a)$  is the MCTS estimated value (for visited actions).
