# Supplementary material
Source: ML conference proceedings conference paper supplement (https://openreview.net/forum?id=S1OAqOtN5U)
Supplement: supplementary_material [file attachment]

# 算法概览图符号表

| 符号                  | 英文含义                                         | 中文含义及其说明                                                                            |
|---------------------|----------------------------------------------|-------------------------------------------------------------------------------------|
| $t$                 | timestep in real environment                 | 在真实环境中的时间步                                                                          |
| $\gamma \in [0, 1]$ | discount factor                              | 折扣因子                                                                                |
| $k$                 | hypothetical step                            | “假设步骤”是指为了考虑某种情况下可能的结果在模型中采取的假设性动作。                                                 |
| $o_t$               | observation at timestep $t$                  | 在时间步 $t$ 的观测                                                                        |
| $u_t$               | reward at timestep $t$                       | 在时间步 $t$ 的奖励                                                                        |
| $a_t$               | action at timestep $t$                       | 在时间步 $t$ 的动作                                                                        |
| $s_t$               | hidden state at timestep $t$                 | 在时间步 $t$ 的 hidden state                                                             |
| $r_t$               | predicted reward at timestep $t$             | 在时间步 $t$ 的预测奖励                                                                      |
| $p$                 | predicted policy logits                      | 预测的策略logits                                                                         |
| $v$                 | predicted value                              | 预测的值                                                                                |
| $h$                 | Representation Network                       | 表征网络。 $s^0 = h(o^0)$ 是 the initial hidden state,                                    |
| $g$                 | Dynamics Network                             | 动力学网络。 $r^k, s^k = g(s^{k-1}, a^k)$                                                 |
| $f$                 | Prediction Network                           | 预测网络。 $p^k, v^k = f(s^k)$                                                           |
| $vp$                | predicted value prefix                       | 预测的值前缀。仅在EfficientZero中使用。                                                          |
| $r_h^k$             | Reward hidden state at hypothetical step $k$ | 在假设步 $k$ 的reward hidden state。仅在EfficientZero中使用。                                   |
| $g^{rnn}$           | (recurrent) Dynamics Network                 | (循环) 动力学网络。<br>$vp^k, s^k, r_h^k = g(s^{k-1}, a^k, r_h^{k-1})$ 。仅在EfficientZero中使用。 |
| $\beta$             | Proposal policy distribution                 | 提议策略分布。仅在Sampled MuZero中使用。                                                         |

|                                                          |                               |                            |
|----------------------------------------------------------|-------------------------------|----------------------------|
| $\hat{\beta}$                                            | empirical policy distribution | 经验策略分布。仅在Sampled MuZero中使用 |
| $\tau = \{s_0, a_0, s_1, a_1, \dots\}$                   | trajectory                    | 轨迹                         |
| $R(\tau) = \sum_{t=1}^T r_t$                             | return                        | 轨迹的奖励                      |
| $G_t = \sum_{k=0}^{T-t-1} \gamma^k r_{t+k}$              | Discounted return             | 回报（累计折扣奖励）                 |
| $\pi_{\theta}(a_t s_t)$                                  | stochastic policy             | 随机性策略（其中 $\theta$ 是网络参数）   |
| $V_{\pi}(s) = \mathbb{E}_{\pi}[G_t s_t = s]$             | state value fuction           | 状态价值函数                     |
| $Q_{\pi}(s, a) = \mathbb{E}_{\pi}[G_t s_t = s, a_t = a]$ | state-action value fuction    | 动作价值函数                     |

(表1：算法概览图的符号说明。)
