# Supplementary material
Source: ML conference proceedings conference paper supplement (https://openreview.net/forum?id=S1OAqOtN5U)
Supplement: supplementary_material [file attachment]

# Monte Carlo Tree Search

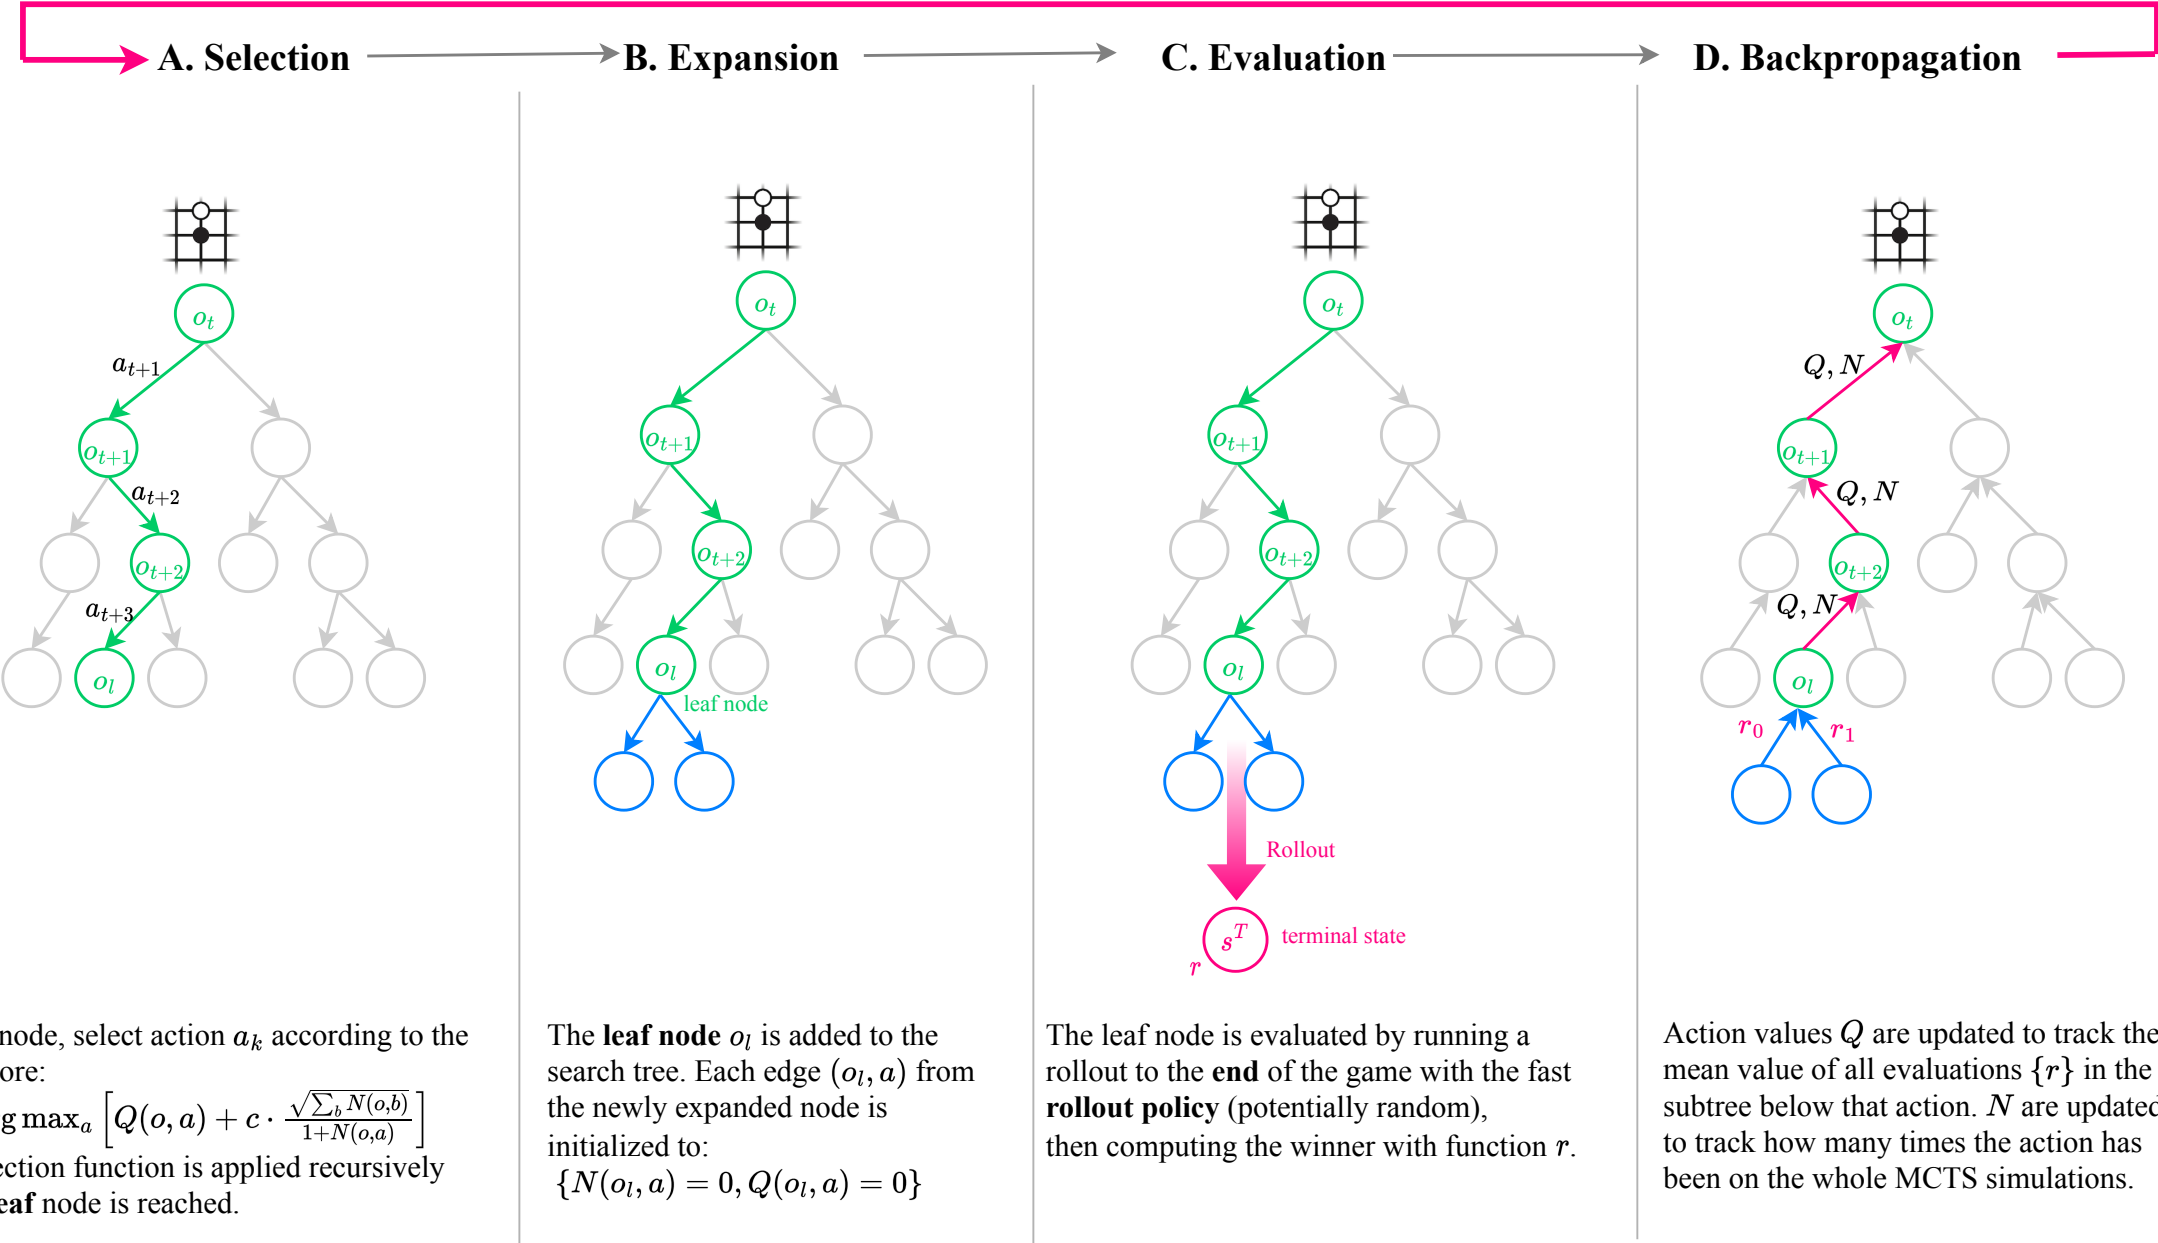

NOTE: The MCTS is divided into **four** stages, and **repeated for a number of simulations**.  
Once the search is complete, we select the action with the **highest** number of visit.
