# Supplementary material
Source: ML conference proceedings conference paper supplement (https://openreview.net/forum?id=S1OAqOtN5U)
Supplement: supplementary_material [file attachment]

# EfficientZero: Self-supervised coconsistency loss, Value prefix, Off-policy correction

## A. Planing

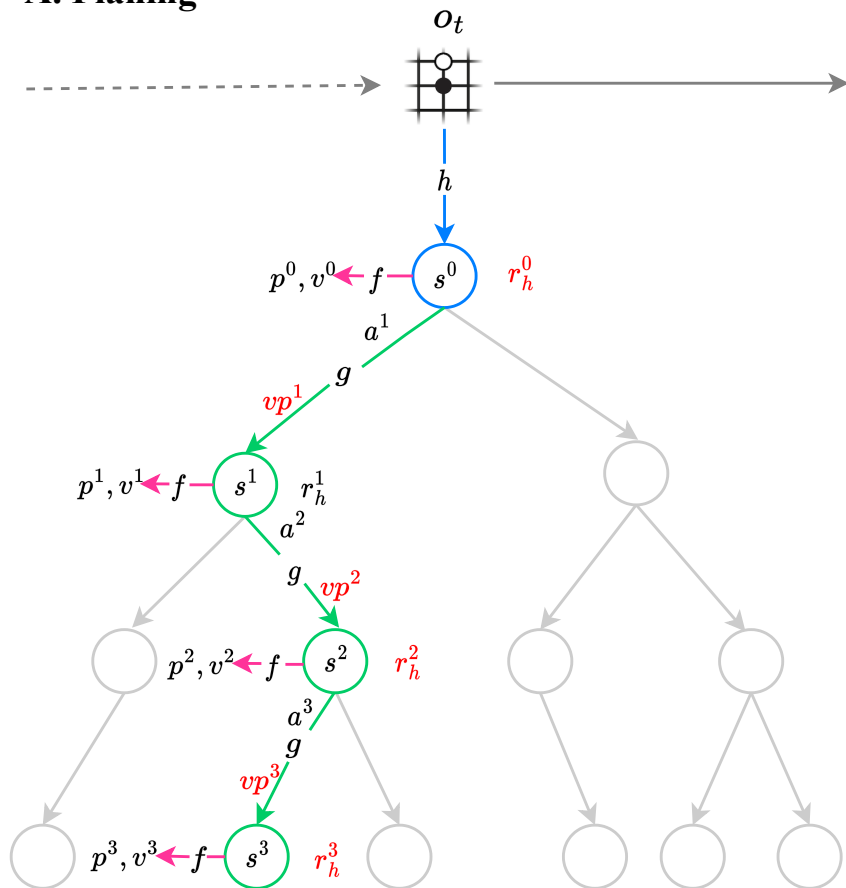

## B. Acting

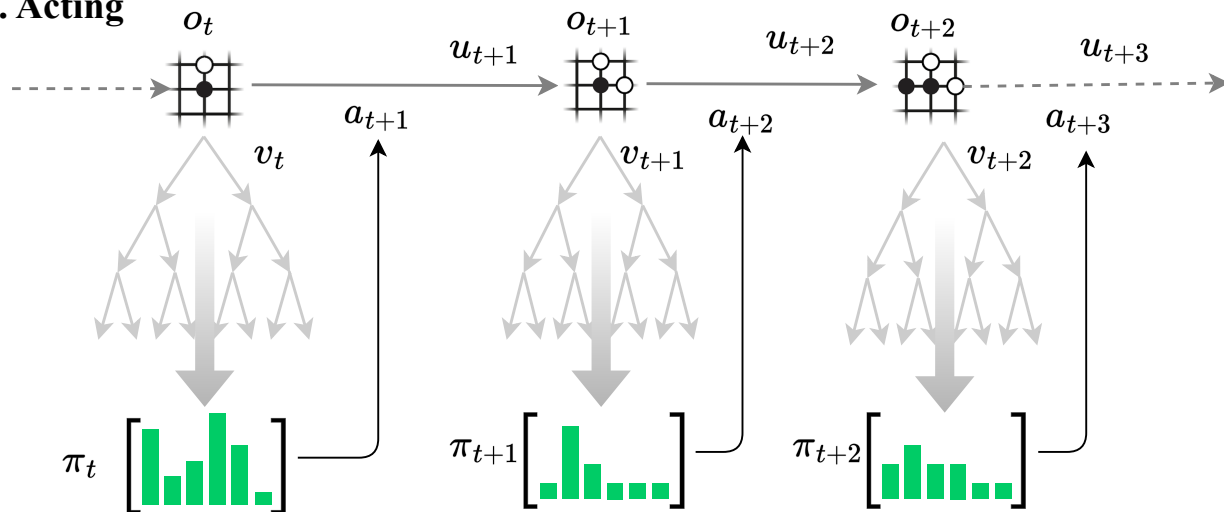

## C. Training

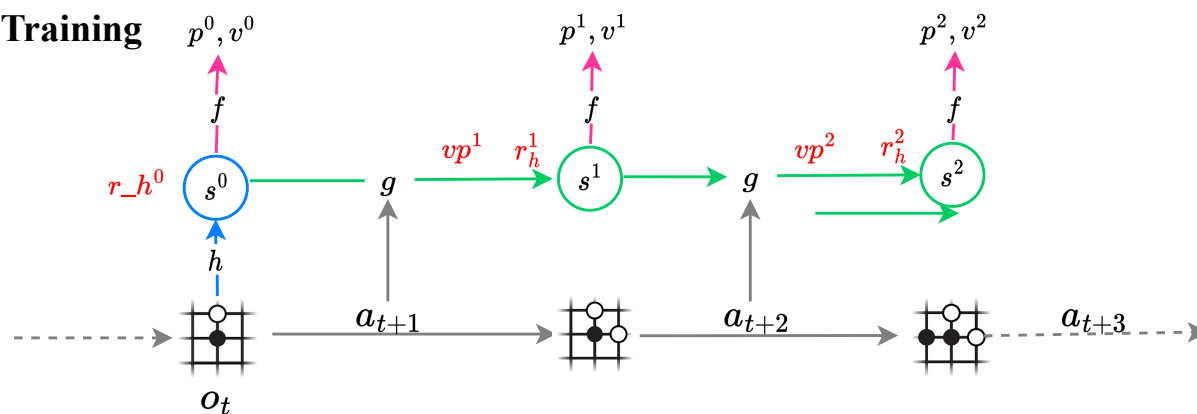

## D. Network and Loss

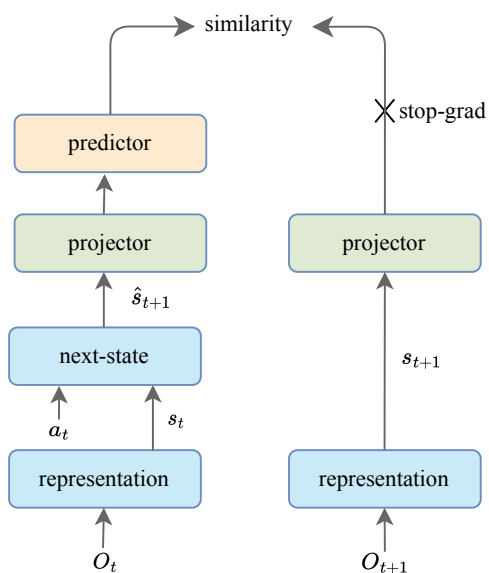

The self-supervised consistency loss.

$$l_t(\theta) = \sum_{k=0}^K l^r(vp_{t+k}, \mathbf{vp}_t^k) + l^v(z_{t+k}, \mathbf{v}_t^k) + l^p(\pi_{t+k}, \mathbf{p}_t^k) + l^{similarity}(s_{t+1}, \hat{s}_{t+1}) + c\|\theta\|^2$$

where,  $z_t = u_t + \gamma u_{t+1} + \dots + \gamma^{l-1} u_{t+l-1} + \gamma^l v_{t+l}^{MCTS}$ ,  $l \leq k$ ,  $v_{t+l}^{MCTS}$  is reanalyzed MCTS root value.

Reference: MuZero target is  $z_t = u_t + \gamma u_{t+1} + \dots + \gamma^{n-1} u_{t+k-1} + \gamma^k v_{t+k}$ .

NOTE:  $g^{rnn}$  (abbreviated as  $g$  in the figure) is the **recurrent** dynamics network,  $vp$  is value prefix,  $r_h$  is reward hidden state.
