# Supplementary material
Source: ML conference proceedings conference paper supplement (https://openreview.net/forum?id=S1OAqOtN5U)
Supplement: supplementary_material [file attachment]

# Sampled MuZero: Learning and Planning in Complex Action Spaces (High Dimensional Discrete or Continuous)

## A. Planing

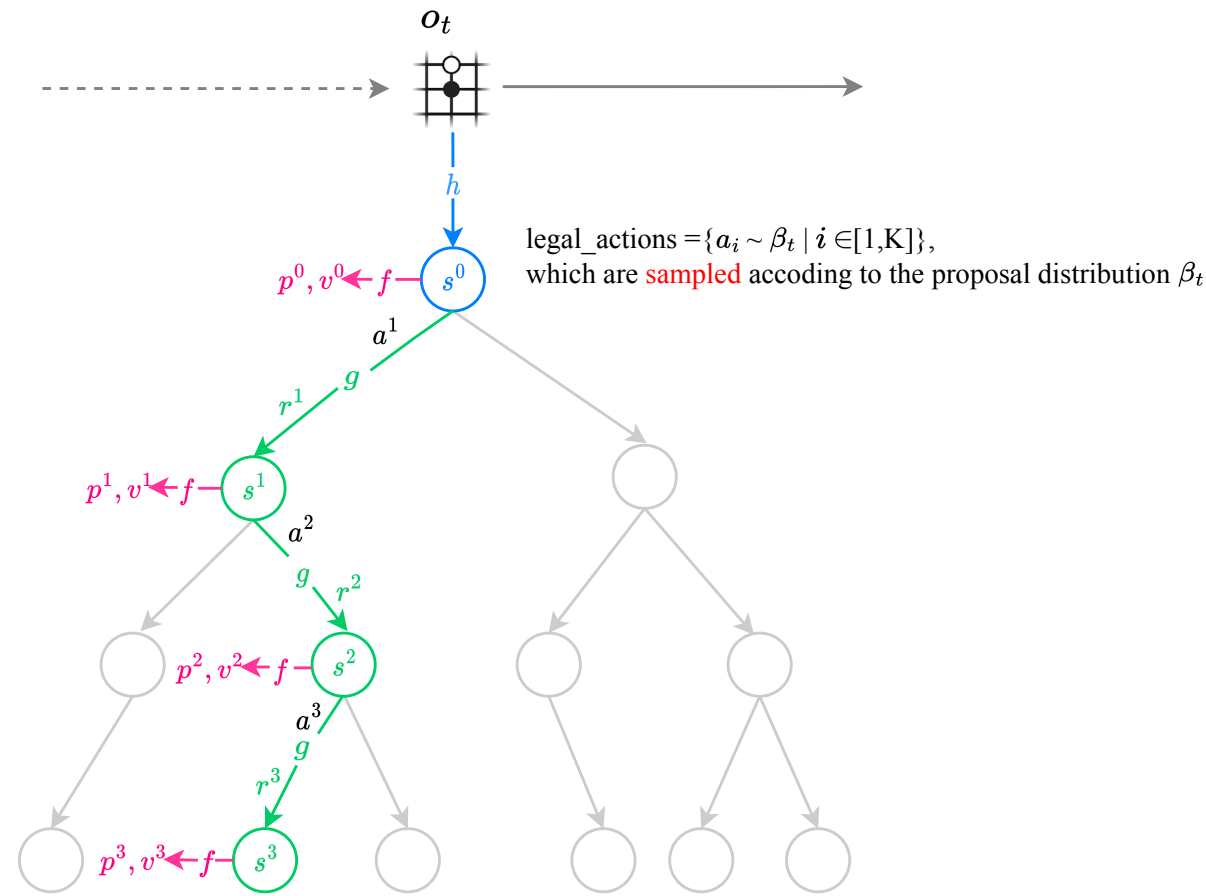

### Selection:

In each node, agent select action  $a^k$  according to the UCB score:

$$a^k = \arg \max_a \left[ Q(s, a) + \hat{\beta} / \beta p(s, a) \cdot \frac{\sqrt{\sum_b N(s, b)}}{1 + N(s, a)} \left( c_1 + \log \left( \frac{\sum_b N(s, b) + c_2 + 1}{c_2} \right) \right) \right]$$

We usually use  $\beta = p$ , thus  $\hat{\beta} / \beta p(s, a) = \hat{\beta}(s, a)$ .

### Sampled-based Policy Improvement.

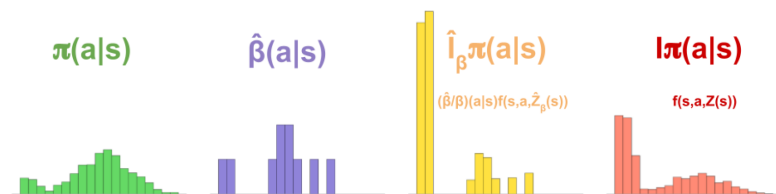

From left to right, current policy  $\pi(a|s)$ , the empirical distribution  $\hat{\beta}(a|s)$ , the sample-based improved policy  $\hat{I}_{\beta}\pi(a|s)$ , the improved policy  $I\pi(a|s)$ , respectively. As the number of samples  $K$  increases,  $\hat{I}_{\beta}\pi(a|s)$  converges to  $I\pi(a|s)$ .

## B. Acting

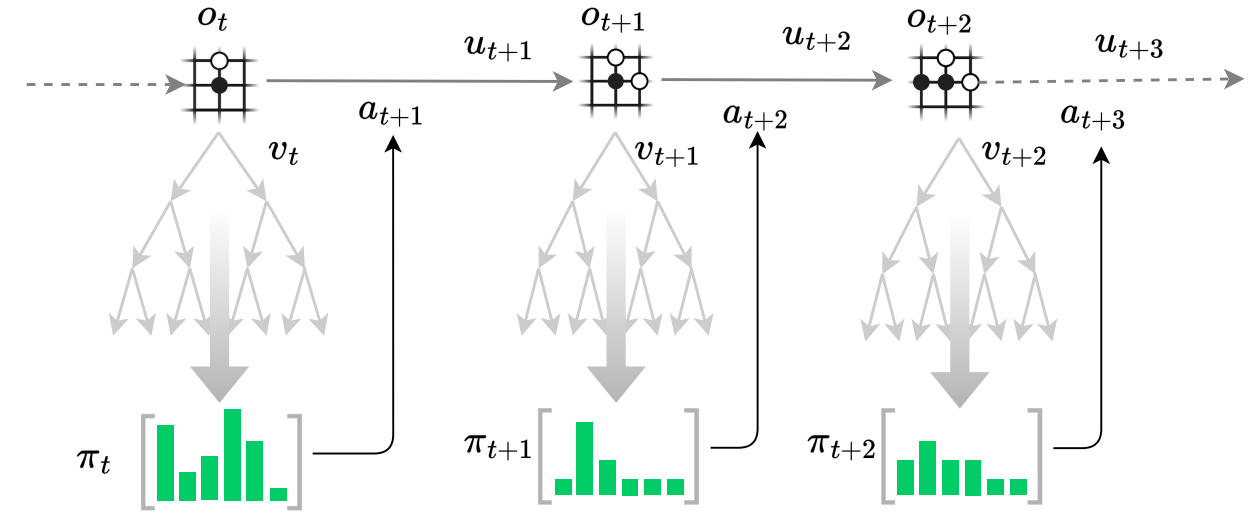

## C. Training

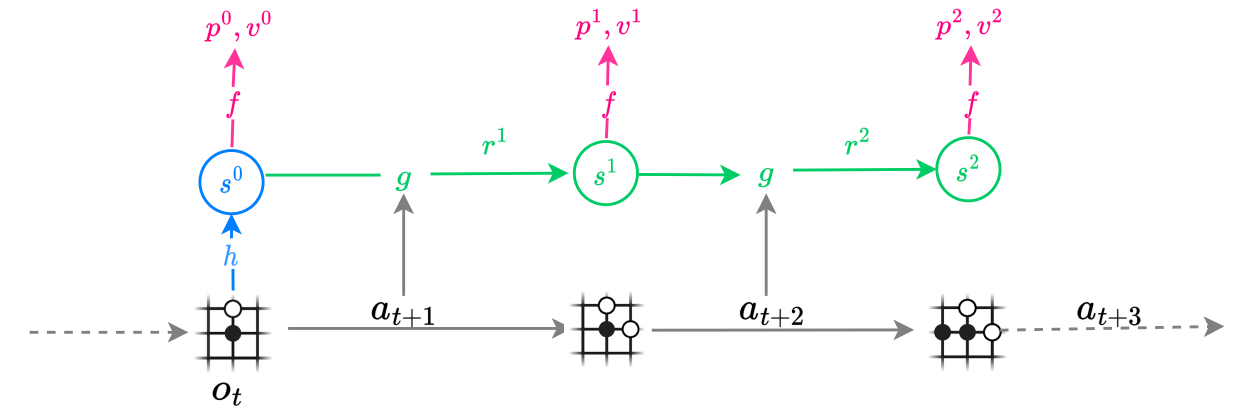

## D. Loss

$$l_t(\theta) = \sum_{k=0}^K l^r(u_{t+k}, r_t^k) + l^v(z_{t+k}, v_t^k) + KL(\pi_{t+k}, \mathbf{p}_t^k) + c\|\theta\|$$

where,  $\pi_{t+k}$  is the MCTS search policy (normalized visit counts), also called the sampled-based improved policy  $\hat{I}_{\beta}\pi(a|s)$ , which is a discrete categorical distribution.

$\mathbf{p}_t^k$  is the predicted (potentially continuous) policy distribution. The policy loss (KL divergence) is calculated in the **sampled** actions.

NOTE:  $\mathbf{p}$  (aka.  $\pi$ ) is predicted policy (potentially continuous) distribution,  $\beta$  is the proposal policy distribution (typically equals  $\pi$ ),  $\hat{\beta}$  is the empirical policy distribution.
