# Supplementary material
Source: ML conference proceedings conference paper supplement (https://openreview.net/forum?id=S1OAqOtN5U)

# Walker2d-v3

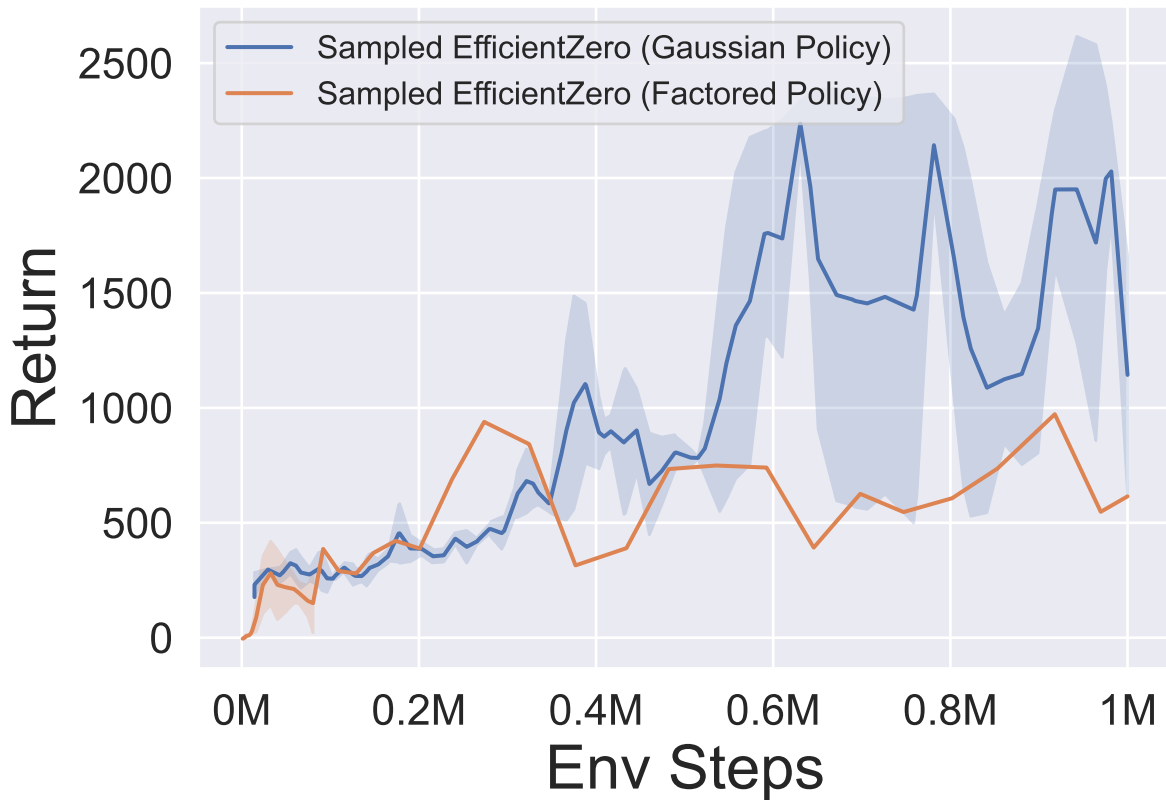

Supplement: supplementary_material [file attachment]

# Hopper-v3

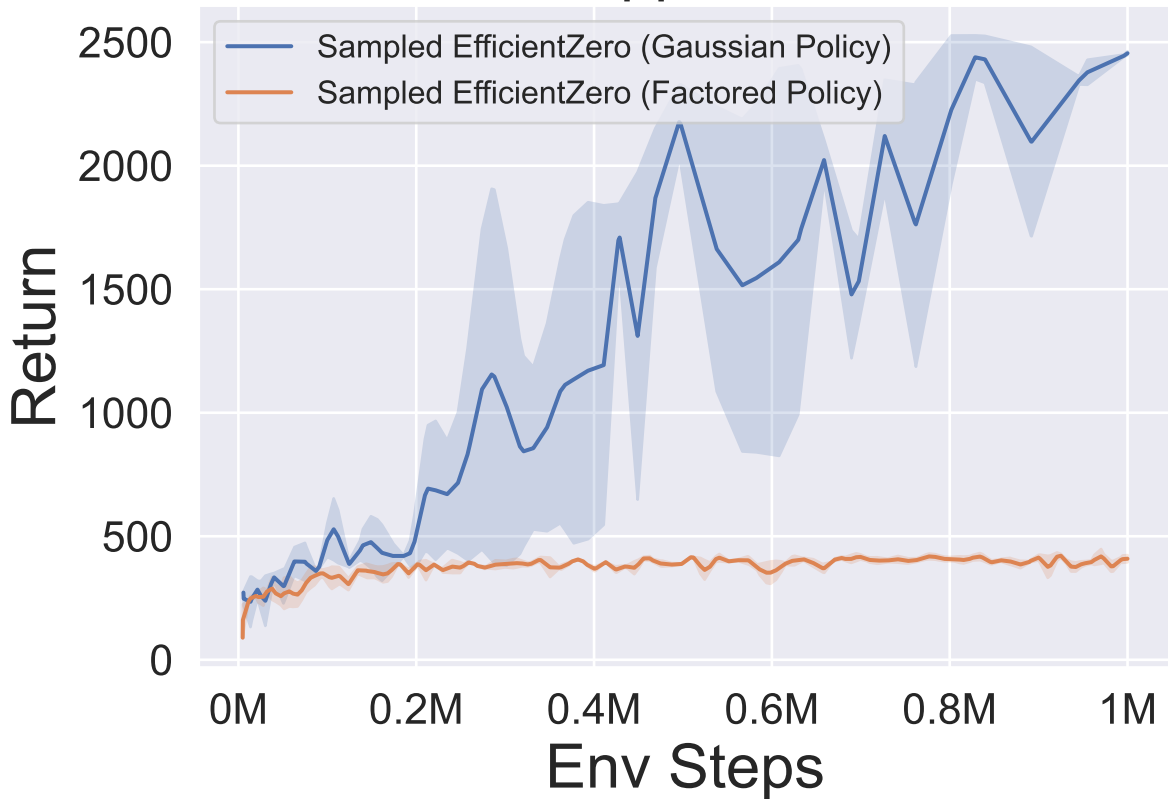

Supplement: supplementary_material [file attachment]
